1 Title: **Functional geometry of auditory cortical resting state networks derived from**  
2 **intracranial electrophysiology**

3  
4 Short title: **Functional geometry of auditory resting state networks**

5  
6 Matthew I. Banks<sup>1,2\*</sup>, Bryan M. Krause<sup>1</sup>, D. Graham Berger<sup>1</sup>, Declan I. Campbell<sup>1</sup>, Aaron D. Boes<sup>3</sup>,  
7 Joel E. Bruss<sup>3</sup>, Christopher K. Kovach<sup>4</sup>, Hiroto Kawasaki<sup>4</sup>, Mitchell Steinschneider<sup>5,6</sup>,  
8 Kirill V. Nourski<sup>4,7</sup>

9  
10 <sup>1</sup>*Department of Anesthesiology, University of Wisconsin, Madison, WI, USA*

11 <sup>2</sup>*Department of Neuroscience, University of Wisconsin, Madison, WI, USA*

12 <sup>3</sup>*Department of Neurology, The University of Iowa, Iowa City, IA 52242, USA*

13 <sup>4</sup>*Department of Neurosurgery, The University of Iowa, Iowa City, IA 52242, USA*

14 <sup>5</sup>*Department of Neurology, Albert Einstein College of Medicine, New York, NY 10461, USA*

15 <sup>6</sup>*Department of Neuroscience, Albert Einstein College of Medicine, New York, NY 10461, USA*

16 <sup>7</sup>*Iowa Neuroscience Institute, The University of Iowa, Iowa City, IA 52242, USA*

17  
18  
19 **\*Corresponding author:**

20 Matthew I. Banks, Ph.D.

21 Professor

22 Department of Anesthesiology

23 University of Wisconsin

24 1300 University Avenue, Room 4605

25 Madison, WI 53706

26 Tel.: (608)261-1143

27 E-mail: mibanks@wisc.edu

## 28 **Author contributions**

29 Conceptualization: M.I.B., K.V.N.

30 Methodology: M.I.B., B.M.K., A.D.B., J.E.B., C.K.K., M.S., K.V.N.

31 Software: M.I.B., B.M.K., D.B.G., D.I.C., C.K.K.

32 Validation: B.M.K.

33 Formal Analysis: M.I.B., B.M.K., D.B.G., D.I.C., K.V.N.

34 Investigation: H.K., K.V.N.

35 Data Curation: B.M.K., C.K.K., J.E.B., H.K., K.V.N.

36 Writing – Original Draft: M.I.B., B.M.K., K.V.N.

37 Writing – Review & Editing: M.I.B., B.M.K., D.B.G., D.I.C., A.D.B., J.E.B., C.K.K., M.S., K.V.N.

38 Visualization: B.M.K., K.V.N.

39 Supervision: M.I.B., K.V.N.

40 Project Administration: K.V.N.

41 Funding Acquisition: M.I.B., K.V.N.

42

## 43 **Competing Interest Statement**

44 The authors declare no competing interests.

45

## 46 **Keywords**

47 Functional connectivity, hierarchy, fMRI, diffusion map embedding, electrocorticography,  
48 intracranial electroencephalography

49

## 50 **Acknowledgements**

51 This work was supported by the National Institutes of Health (grant numbers R01-DC04290,  
52 R01-GM109086). We are grateful to Jess Banks, Alex Billig, Haiming Chen, Phillip Gander,  
53 Christopher Garcia, Matthew Howard, Ariane Rhone, and Matthew Sutterer for help with data  
54 collection, analysis, and comments on the manuscript.

55 **Blurb**

56 We describe the organization of human neocortex on multiple spatial scales based on resting  
57 state intracranial electrophysiology. We focus on cortical regions involved in auditory  
58 processing and examine inter-regional hierarchical relationships, network topology, and  
59 hemispheric lateralization. This work introduces a powerful analytical tool to examine  
60 mechanisms of altered arousal states, brain development, and neuropsychiatric disorders.

61 **Abstract**

62 Understanding central auditory processing critically depends on defining underlying auditory  
63 cortical networks and their relationship to the rest of the brain. We addressed these questions  
64 using resting state functional connectivity derived from human intracranial  
65 electroencephalography. Mapping recording sites into a low-dimensional space where  
66 proximity represents functional similarity revealed a hierarchical organization. At fine scale, a  
67 group of auditory cortical regions excluded several higher order auditory areas and segregated  
68 maximally from prefrontal cortex. On mesoscale, the proximity of limbic structures to auditory  
69 cortex suggested a limbic stream that parallels the classically described ventral and dorsal  
70 auditory processing streams. Identities of global hubs in anterior temporal and cingulate cortex  
71 depended on frequency band, consistent with diverse roles in semantic and cognitive  
72 processing. On a macro scale, observed hemispheric asymmetries were not specific for speech  
73 and language networks. This approach can be applied to multivariate brain data with respect to  
74 development, behavior, and disorders.

## 75 Introduction

76 The meso- and macroscopic organization of human neocortex has been investigated extensively  
77 using resting state (RS) functional connectivity, primarily using functional magnetic resonance  
78 imaging (fMRI)[1, 2]. RS data are advantageous as they avoid the substantial confound of  
79 stimulus-driven correlations yet identify networks that overlap with those obtained using  
80 event-related data[3], and thus are relevant to cognitive and perceptual processing. RS fMRI  
81 has contributed greatly to our understanding of the organization of the human auditory cortical  
82 hierarchy[4-6], but only a few complementary studies have been conducted using  
83 electrophysiology in humans (e.g., Refs.[7-9]). Compared to fMRI, intracranial  
84 electroencephalography (iEEG) offers superior spatio-temporal resolution, allowing for analyses  
85 that accommodate frequency-dependent features of information exchange in these  
86 networks[10, 11]. For example, cortico-cortical feedforward versus feedback information  
87 exchange occurs via band-specific communication channels (gamma band and beta/alpha  
88 bands, respectively) in both the visual[11-15] and auditory[16-19] systems. There are also  
89 important regions involved in speech and language processing for which iEEG can provide  
90 superior spatial resolution and signal characteristics compared to fMRI, including in the anterior  
91 temporal lobe[20, 21] and the upper versus lower banks of the superior temporal sulcus  
92 (STS)[22, 23]. However, variable electrode coverage in human intracranial patients and small  
93 sample sizes are challenges to generalizing results.

94 We overcome these limitations using a large cohort of subjects that together have coverage  
95 over most of the cerebral cortex and leverage these data to address outstanding questions  
96 about auditory networks. We address the organization of human auditory cortex at three  
97 spatial scales: fine-scale organization of regions adjacent to canonical auditory cortex,  
98 clustering of cortical regions into functional processing streams, and hemispheric (a)symmetry  
99 associated with language dominance. We present a unified analytical framework applied to  
100 resting state human iEEG data that embeds functional connectivity data into a Euclidean space  
101 in which proximity represents functional similarity. A similar analysis has been applied  
102 previously to RS fMRI data[24-26]. We extend this analytical approach and demonstrate  
103 methodology appropriate for hypothesis testing at each of these spatial scales.

104 At the fine scale, individual areas within canonical auditory cortex and beyond have different  
105 sensitivity and specificity of responses with respect to stimulus attributes[27-29]. These  
106 differences are related to underlying connectivity patterns both within the auditory cortex and  
107 with other brain areas[22]. Though there is broad agreement that posteromedial Heschl's gyrus  
108 (HGPM) represents core auditory cortex, functional relationships among HGPM and  
109 neighboring higher-order areas are still a matter of debate. For example, the anterior portion of  
110 the superior temporal gyrus (STGA) and planum polare (PP) are adjacent to auditory cortex on  
111 Heschl's gyrus, yet diverge from it functionally[30, 31]. The posterior insula (InsP), on the other  
112 hand, has response properties similar to HGPM, yet is not considered a canonical auditory  
113 area[32]. The STS is a critical node in speech and language networks[22, 33-37], yet its

114 functional relationships with other auditory areas are difficult to distinguish with neuroimaging  
115 methods. Indeed, distinct functional roles of its upper and lower banks (STSU, STSL) have only  
116 been recently elucidated with iEEG[23].

117 Questions remain regarding mesoscale organization as well. The auditory hierarchy is posited to  
118 be organized along two processing streams (ventral “what” and dorsal “where/audiomotor”)  
119 [38-40]. The specific brain regions involved and the functional relationships within each stream  
120 are vigorously debated[41-44]. Furthermore, communication between auditory cortex and  
121 hippocampus, amygdala, and anterior insula (InsA)[45] – areas involved in auditory working  
122 memory and processing of emotional aspects of auditory information[46-49] – suggests a third  
123 “limbic” auditory processing stream, complementary to the dorsal and ventral streams.

124 At a macroscopic scale, hemispheric lateralization is a classically described organizational  
125 feature of speech and language function[50, 51]. However, previous studies have shown  
126 extensive bilateral activation during speech and language processing[52-54], and more recent  
127 models emphasize this bilateral organization[39]. Thus, the degree to which lateralization  
128 shapes the auditory hierarchy and is reflected in hemisphere-specific connectivity profiles is  
129 unknown[38, 42, 55-58].

130 To address these questions, we applied diffusion map embedding (DME)[59, 60] to functional  
131 connectivity measured between cortical regions of interest (ROIs). DME is part of a broader  
132 class of analytical approaches that leverage the spectral properties of similarity matrices to  
133 reveal the intrinsic structure of datasets[61]. When applied to multivariate neurophysiological  
134 signals, DME maps connectivity from anatomical space (i.e., the location of the recording sites  
135 in the brain) into a Euclidean embedding space that reveals a “functional geometry”[24]. In this  
136 space, the proximity of two ROIs reflects similarity in connectivity to the rest of the network.  
137 Implicit in the use of the term ‘functional’ is the assumption that two regions of interest that  
138 are similarly connected to the rest of the brain are performing similar functions. Here, we use  
139 the DME approach to provide a low-dimensional representation convenient for display while  
140 also facilitating quantitative comparisons on multiple spatial scales. We tested pre-specified  
141 hypotheses of specific ROI relationships involving STSL and STSU in the gamma band using  
142 permutation tests. We applied exploratory analyses to other bands, to hierarchical clustering to  
143 identify functional processing streams, and to contrasts of whole embeddings between  
144 participant cohorts to investigate hemispheric differences in network organization.

145 This is the first time to our knowledge DME analysis has been applied to electrophysiological  
146 data, which allows exploration of the band-specificity of network structure. Also novel in our  
147 approach is the examination of relationships based on inter-ROI distances in embedding space,  
148 which are robust to changes in the underlying basis functions of the space.

## 149 Results

### 150 *DME applied to iEEG data*

151 Intracranial electrodes densely sampled cortical structures involved in auditory processing in  
152 the temporal and parietal lobes, as well as prefrontal, sensorimotor, and other ROIs in 49  
153 participants (22 female; Fig. 1, Supplementary Tables 1, 2). A total of 6742 recording sites  
154 (66.1% subdural, 33.9% depth) were used in the analyses. On average, each participant  
155 contributed  $138 \pm 54$  recording sites, representing  $28 \pm 7.7$  ROIs (mean  $\pm$  standard deviation) (see  
156 example in Fig. 2a). Figure 1b summarizes both subdural and depth electrode coverage by  
157 plotting recording sites in Montreal Neurological Institute (MNI) coordinate space and  
158 projecting them onto an average template brain for spatial reference. Of note, assignment of  
159 recording sites to ROIs as depicted in Figure 1 was made based on the sites' locations in each  
160 participant's brain rather than based on the projection onto the template brain, thus  
161 accounting for the high individual variability in cortical anatomy (see Methods for details).

162 The brain parcellation scheme depicted in Figure 1a was developed based on a combination of  
163 physiological and anatomical criteria and has been useful in our previous analyses that were  
164 largely focused on auditory processing[62-67]. One goal of the analysis presented in this study  
165 is to develop instead a parcellation scheme based on functional relationships between brain  
166 areas. Accordingly, we revisit below the parcellation shown in Fig. 1a with a data-driven  
167 scheme.

168 DME was applied to pairwise functional connectivity measured as orthogonalized power  
169 envelope correlations[68] computed between recording sites in each participant. We focus on  
170 gamma band power envelope correlations because of its established role in feedforward  
171 information exchange in the auditory system[16-19], and use gamma band as a reference in  
172 presentation of data from other bands. The functional connectivity matrix was normalized and  
173 thresholded to yield a diffusion matrix  $\mathbf{P}_{\text{symm}}$  with an apparent community structure along the  
174 horizontal and vertical dimensions (Fig. 2b). DME reveals the functional geometry of the  
175 sampled cortical sites by using the structure of  $\mathbf{P}_{\text{symm}}$  and a free parameter  $t$  to map the  
176 recording sites into an embedding space. In this space, proximity between nodes represents  
177 similarity in their connectivity to the rest of the network (Fig. 2c; see Supplementary Fig. 1 for  
178 additional views). The parameter  $t$  corresponds to diffusion time: larger values of  $t$  shift focus  
179 from local towards global organization. DME exhibited superior signal-to noise characteristics  
180 compared to direct analysis of functional connectivity in 43 out of 49 participants  
181 (Supplementary Fig. 2).

182 Functionally distinct regions are isolated along principal dimensions in embedding space. For  
183 example, in Figure 2c, auditory cortical sites (red/orange/yellow) and sites in prefrontal cortex  
184 (blue) were maximally segregated along dimension 1 (see Fig. 1 and Supplementary Table 3 for  
185 the list of abbreviations). Other regions (e.g., middle temporal gyrus) had a more distributed  
186 representation within the embedding space, consistent with their functional heterogeneity.

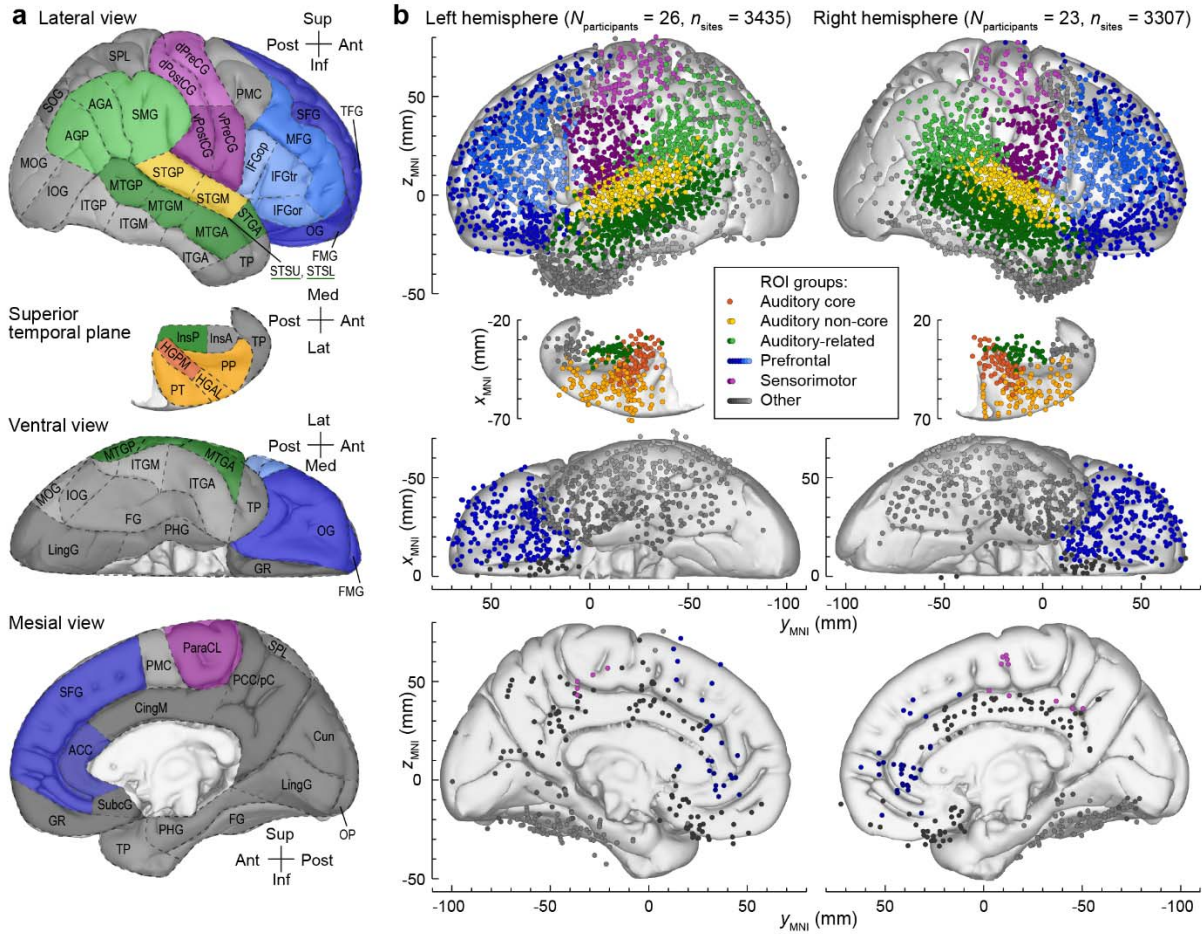

**c**

|                                    |                                            |                                           |                                                 |                                                |         |
|------------------------------------|--------------------------------------------|-------------------------------------------|-------------------------------------------------|------------------------------------------------|---------|
| Auditory core                      | Heschl's gyrus, posteromedial portion      | HGPM                                      | Other                                           | Premotor cortex                                | PMC     |
|                                    | Heschl's gyrus, anterolateral portion      | HGAL                                      |                                                 | Cingulate gyrus, middle portion                | CingM   |
| Auditory non-core                  | Planum temporale                           | PT                                        |                                                 | Cingulate gyrus, posterior portion / Precuneus | PCC/pC  |
|                                    | Planum polare                              | PP                                        |                                                 | Parahippocampal gyrus                          | PHG     |
| Auditory-related                   | Superior temporal gyrus, posterior portion | STGP                                      |                                                 | Fusiform gyrus                                 | FG      |
|                                    | Superior temporal gyrus, middle portion    | STGM                                      |                                                 | Inferior temporal gyrus, posterior portion     | ITGP    |
|                                    | Superior temporal gyrus, anterior portion  | STGA                                      |                                                 | Inferior temporal gyrus, middle portion        | ITGM    |
|                                    | Posterior insula                           | InsP                                      |                                                 | Inferior temporal gyrus, anterior portion      | ITGA    |
|                                    | Superior temporal sulcus, upper bank       | STSU                                      |                                                 | Temporal pole                                  | TP      |
|                                    | Superior temporal sulcus, lower bank       | STSL                                      |                                                 | Anterior insula                                | InsA    |
| Prefrontal                         | Middle temporal gyrus, posterior portion   | MTGP                                      |                                                 | Frontal operculum                              | fOperc* |
|                                    | Middle temporal gyrus, middle portion      | MTGM                                      |                                                 | Parietal operculum                             | pOperc* |
|                                    | Middle temporal gyrus, anterior portion    | MTGA                                      |                                                 | Gyrus rectus                                   | GR      |
|                                    | Supramarginal gyrus                        | SMG                                       |                                                 | Subcallosal gyrus                              | SubcG   |
|                                    | Angular gyrus, posterior portion           | AGP                                       | Superior parietal lobule / Intraparietal sulcus | SPL                                            |         |
|                                    | Angular gyrus, anterior portion            | AGA                                       | Cuneus                                          | Cun                                            |         |
|                                    | Sensorimotor                               | Inferior frontal gyrus, pars opercularis  | IFGop                                           | Lingual gyrus                                  | LingG   |
|                                    |                                            | Inferior frontal gyrus, pars triangularis | IFGtr                                           | Occipital pole                                 | OP      |
|                                    |                                            | Inferior frontal gyrus, pars orbitalis    | IFGor                                           | Superior occipital gyrus                       | SOG     |
|                                    |                                            | Middle frontal gyrus                      | MFG                                             | Middle occipital gyrus                         | MOG     |
| Superior frontal gyrus             |                                            | SFG                                       | Inferior occipital gyrus                        | IOG                                            |         |
| Anterior cingulate cortex          |                                            | ACC                                       | Amygdala                                        | Amyg*                                          |         |
| Orbital gyri                       |                                            | OG                                        | Hippocampus                                     | Hipp*                                          |         |
| Other                              | Transverse frontopolar gyrus               | TFG                                       | Putamen                                         | Put*                                           |         |
|                                    | Frontomarginal gyrus                       | FMG                                       | Globus pallidus                                 | GP*                                            |         |
|                                    | Precentral gyrus, dorsal portion           | dPreCG                                    | Caudate nucleus                                 | Caud*                                          |         |
|                                    | Postcentral gyrus, dorsal portion          | dPostCG                                   | Substantia innominata                           | SubInn*                                        |         |
|                                    | Precentral gyrus, ventral portion          | vPreCG                                    | Ventral striatum                                | vStr*                                          |         |
| Postcentral gyrus, ventral portion | vPostCG                                    |                                           |                                                 |                                                |         |
| Paracentral lobule                 | ParaCL                                     |                                           |                                                 |                                                |         |

\*not pictured

188 **Figure 1.** ROIs and electrode coverage in all 49 participants. **a:** ROI parcellation scheme. **b:** Locations of  
189 recording sites, determined for each participant individually and color-coded according to the ROI  
190 group, are plotted in Montreal Neurological Institute (MNI) coordinate space and projected onto the  
191 Freesurfer average template brain for spatial reference. Color shades represent different ROIs within a  
192 group. Projections are shown on the lateral, top-down (superior temporal plane), ventral and mesial  
193 views (top to bottom). Recording sites over orbital, transverse frontopolar, inferior temporal gyrus and  
194 temporal pole are shown in both the lateral and the ventral view. Sites in fusiform, lingual,  
195 parahippocampal gyrus and gyrus rectus are shown in both the ventral and medial view. Sites in the  
196 frontal operculum ( $n = 23$ ), parietal operculum ( $n = 21$ ), amygdala ( $n = 80$ ), hippocampus ( $n = 86$ ),  
197 putamen ( $n = 15$ ), globus pallidus ( $n = 1$ ), caudate nucleus ( $n = 10$ ), substantia innominata ( $n = 5$ ), and  
198 ventral striatum ( $n = 2$ ) are not shown. See Supplementary Table 2 for detailed information on electrode  
199 coverage. **c:** ROI groups, ROIs and abbreviations used in the present study. See Supplementary Table 3  
200 for alphabetized list of abbreviations.



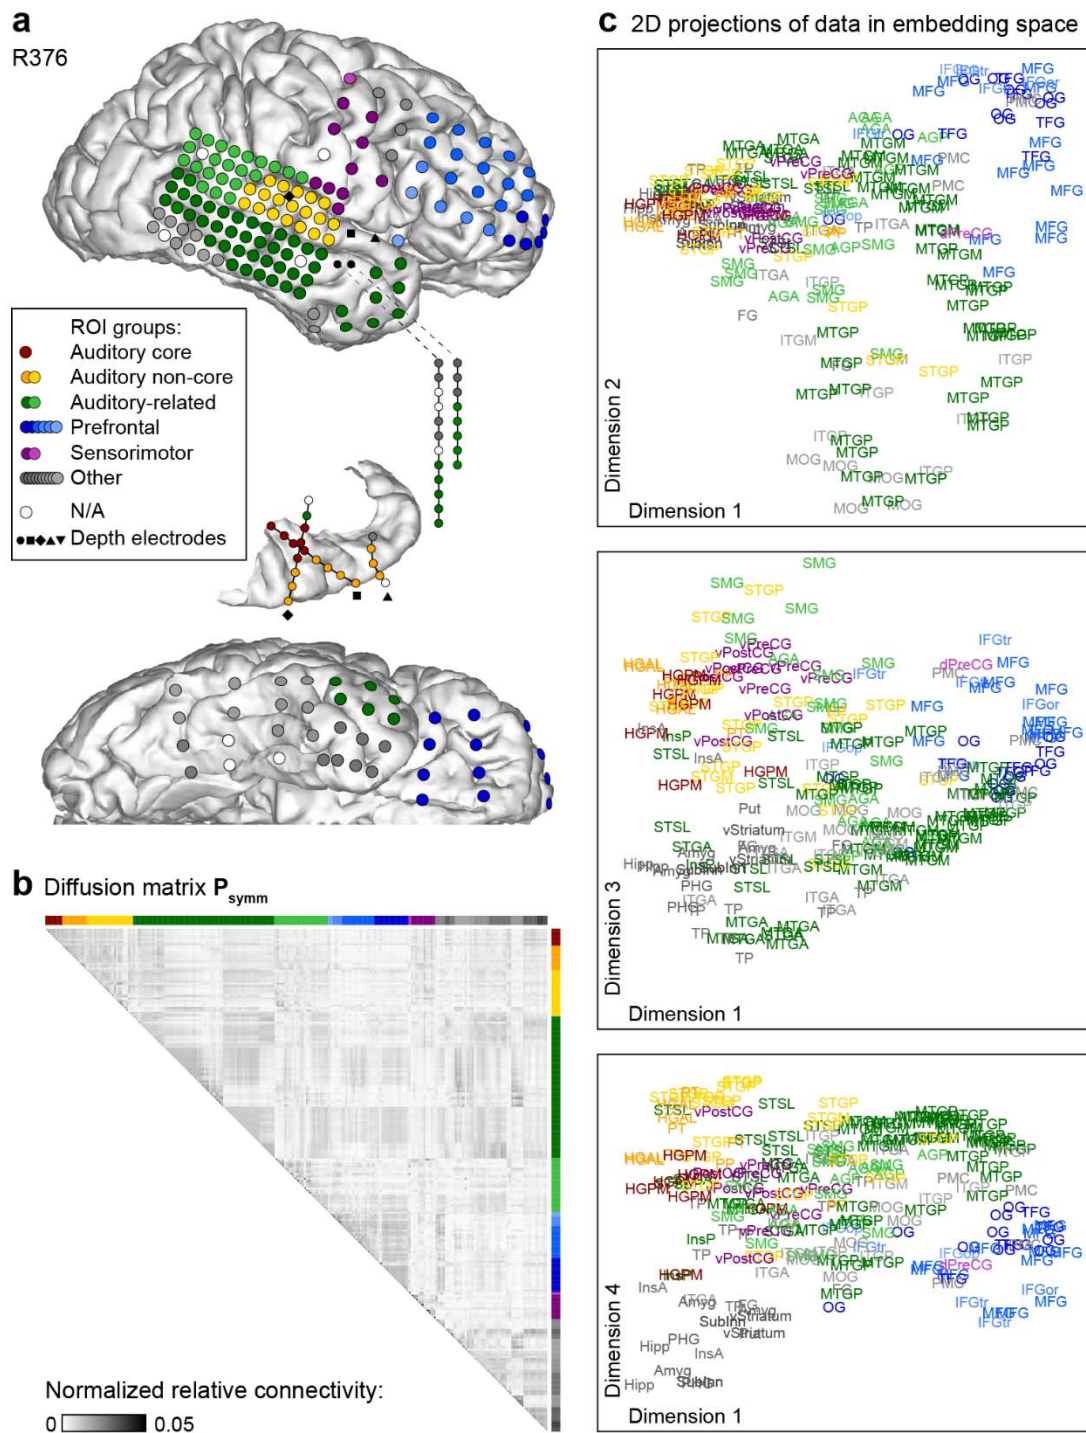

201

202 **Figure 2.** Functional geometry of cortical networks revealed by DME applied to gamma band power  
 203 envelope correlations in a single participant (R376). **a:** Electrode coverage. **b:** Diffusion matrix  $P_{\text{symm}}$ . **c:**  
 204 Data plotted on the same scale in the 1st and 2nd, 1st and 3rd, and 1st and 4th dimensions of  
 205 embedding space (top to bottom). Two points that are close in embedding space are similarly connected  
 206 to the rest of the network, and thus assumed to be functionally similar.

## 207 *Functional geometry of cortical networks*

208 To pool data across participants with variable electrode coverage,  $\mathbf{P}_{\text{symm}}$  matrices were  
209 computed at the ROI level and averaged across participants. The results for gamma band data  
210 are shown in Figure 3a. The eigenvalue spectrum  $|\lambda_i|$  of this averaged  $\mathbf{P}_{\text{symm}}$  showed a clear  
211 separation between the first four and the remaining dimensions (Fig. 3a, inset), indicating that  
212 the first four dimensions of embedding space accounted for much of the community structure  
213 of the data. Indeed, these first four dimensions accounted for >80% of the diffusion distance  
214 averaged across all pairwise distances in the space, a typical measure for deciding which  
215 dimensions to retain when DME is used as a dimensionality reduction method[60]. This  
216 inflection point in the eigenvalue spectrum was identified algorithmically (see Methods) for  
217 each frequency band and yielded the number of retained dimensions  $n = 6, 6, 7, 4,$  and 6 for  
218 theta, alpha, beta, gamma, and high gamma bands, respectively.

219 The gamma band data are plotted in the first four dimensions of embedding space in Figure 3b,  
220 where the sizes of the ellipsoids for each ROI represent estimates of position variance across  
221 participants obtained via bootstrapping. These data provide a graphical representation of the  
222 functional geometry of all sampled brain regions (see also Supplementary Fig. 3 and  
223 Supplementary Movies 1 and 2; see Supplementary Fig. 4 for average beta band embeddings).  
224 Functionally related ROIs tended to group together, and these ROI groups segregated within  
225 embedding space. For example, auditory cortical and prefrontal ROIs were at opposite ends of  
226 dimension 1, as were visual cortical (ITGP, ITGM, LingG, FG) and prefrontal ROIs. Parietal and  
227 limbic ROIs were at opposite ends of dimension 2, and auditory and visual ROIs were maximally  
228 segregated along dimension 4. By contrast, some ROIs [e.g., STGA, anterior and middle portions  
229 of middle temporal gyrus (MTGA, MTGM), middle cingulate (CingM)] were situated in the  
230 interior of the data cloud.

231 One advantage of applying DME to electrophysiological data is the opportunity to examine  
232 features of the embeddings that are band-specific. DME applied to bands other than gamma  
233 produced similar embeddings. Inter-ROI distances were similar for adjacent bands ( $r \geq 0.82$ ),  
234 and even for non-adjacent bands ( $r \geq 0.67$ ; Supplementary Fig. 5). Thus, DME identified some  
235 organizational features of cortical networks that were not band-specific.

236 The mean correlation between inter-ROI embedding distances for original versus bootstrapped  
237 data was high in each band ( $r = 0.91, 0.85, 0.87, 0.88,$  and  $0.86$  for high gamma, gamma, beta,  
238 alpha, and theta, respectively). These analyses suggest that DME offers a robust approach to  
239 exploring functional geometry.

240

241

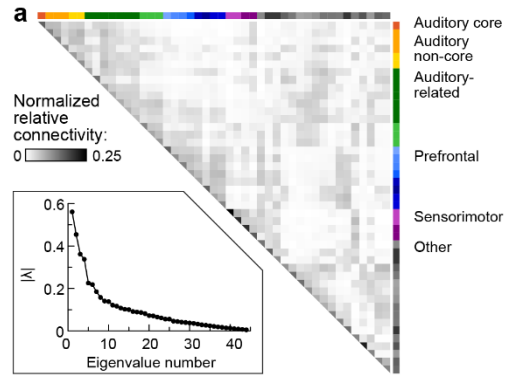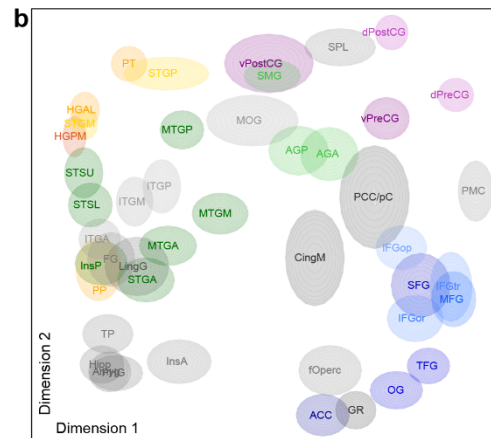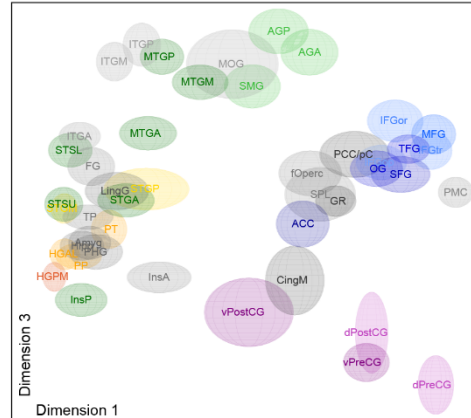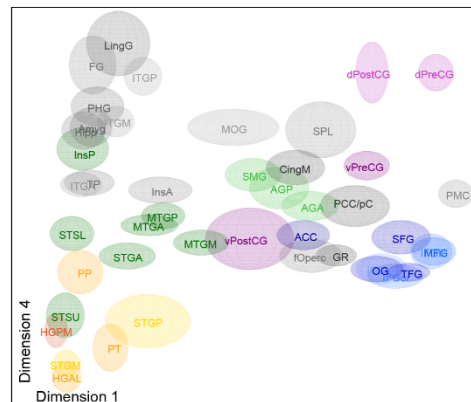

243 **Figure 3.** Summary of functional geometry of cortical networks via DME applied to gamma band power  
244 envelope correlations. **a:** Average diffusion matrix. **Inset:** Eigenvalue spectrum. **b:** Data plotted on the  
245 same scale in the 1st and 2nd, 1st and 3rd, and 1st and 4th dimensions of embedding space (top to  
246 bottom). Estimates of variance across participants in the locations of each ROI in embedding space were  
247 obtained via bootstrapping and are represented by the size of the ellipsoid for each ROI.

248 *DME elucidates fine-scale functional organization beyond anatomical proximity*

249 The connectivity metric employed here discards components exactly in phase between two  
250 brain regions, mitigating the influence of volume conduction[68]. However, brain areas that are  
251 anatomically close to each other are often densely interconnected[69-71]. Thus, anatomical  
252 proximity is expected to contribute to the observed functional geometry. Overall, however,  
253 anatomical proximity explained only 14% of the variance in embedding distance derived from  
254 gamma band connectivity (mean adjusted  $r^2 = 0.14$  for regressions between anatomical and  
255 embedding Euclidean distance, calculated separately for each ROI). Anatomically adjacent ROIs  
256 that were separated in embedding space for gamma band included STGA and STGM, temporal  
257 pole (TP) and the rest of the anterior temporal lobe (ATL), and InsA and InsP. Similar results  
258 were obtained for embeddings derived from beta band data (Supplementary Figure 4). Thus,  
259 the embedding representation elucidates organizational features beyond anatomical proximity.

260

261 *Planum polare (PP) and posterior insula (InsP) are functionally distinct from other auditory*  
262 *cortical ROIs*

263 The grouping of canonical auditory ROIs is apparent in Figure 3b and Supplementary Figure 4,  
264 as PT, HGAL, and middle and posterior portions of the superior temporal gyrus (STGM, STGP)  
265 were all close to HGPM in embedding space. One notable exception, planum polare (PP),  
266 located immediately anterior to anterolateral Heschl's gyrus (HGAL), segregated from the rest  
267 of auditory cortical ROIs along dimension 2 in embedding space (Fig. 3b, upper panel, lower left  
268 corner; Supplementary Fig. 4, upper left panel, lower left corner). This result is consistent with  
269 PP being a higher order auditory area.

270 In contrast, InsP is a region that is anatomically distant from HGPM yet responds robustly to  
271 acoustic stimuli[32], suggesting that a portion of this area could be considered an auditory  
272 region[72]. For example, InsP can track relatively fast (>100 Hz) temporal modulations, similar  
273 to HGPM[32, 73], possibly due to direct inputs from the auditory thalamus. However, InsP was  
274 functionally segregated from HGPM and was situated between auditory and limbic ROIs,  
275 consistent with the broader role of InsP in polysensory exteroceptive processing and  
276 interoception[74, 75].

277

278 *Hierarchical distinction of STSU and STSL*

279 Unlike InsP and PP, STSU was located near early auditory regions in embedding space, and for  
280 gamma band was significantly closer to auditory cortex (core and non-core ROIs; see Fig. 1) in  
281 embedding space compared to STSL (test by permutation of STSU/STSL labels,  $p < 0.0001$ ). In  
282 beta band, the difference in distance to auditory cortex was not significant ( $p = 0.051$ ). This  
283 distinction between STSL and STSU is consistent with differences in their response properties  
284 reported recently[23]. Particularly, responses in STSL, but not STSU, were predictive of

285 performance in a semantic categorization task. Those results suggest that STSL would likely be  
286 closer in embedding space to regions involved in semantic processing compared to STSU.  
287 Indeed, for gamma band, STSL was significantly closer to ROIs reported to contribute to  
288 semantic processing [inferior frontal gyrus (IFG) pars operculum/triangularis/orbitalis (IFGop,  
289 IFGtri, IFGor), TP, STGA, MTGA, MTGP, anterior and posterior portions of inferior temporal  
290 gyrus (ITGA, ITGP), anterior and posterior angular gyrus (AGA, AGP), supramarginal gyrus  
291 (SMG)][76-78] compared to STSU (test by permutation of STSU/STSL labels,  $p = 0.0011$ ). Similar  
292 results were obtained in beta band ( $p = 0.00044$ )

293

#### 294 *Organization of ROIs outside auditory cortex*

295 The data of Figure 3b and Supplementary Figure 4 also characterize the temporal and parietal  
296 ROIs outside auditory cortex that are nonetheless part of the extended auditory network,  
297 including components of the dorsal and ventral processing streams. These ‘auditory-related’  
298 ROIs (shades of green), were distributed along a considerable extent of all four dimensions,  
299 consistent with functional heterogeneity of these regions and their involvement in integration  
300 of sensory information from multiple modalities[79].

301 This heterogeneity, as well as the embedding locations of PP and STSU, suggests that DME can  
302 be used to improve the brain parcellation scheme from Figure 1. For instance, MTGA in that  
303 scheme was labeled as part of the ‘Auditory-related’ group based on its location on the lateral  
304 temporal convexity and its anatomical proximity to canonical auditory cortex. The ‘Other’ group  
305 contains a large and diverse collection of ROIs whose relationship to auditory structures and  
306 speech and language processing is unclear. A more principled approach is warranted to arrange  
307 these and other ROIs into functional groups or streams based upon their physiology. One  
308 approach to developing such a data-driven parcellation scheme is to apply hierarchical  
309 clustering to the data in embedding space.

310

#### 311 *Hierarchical clustering identifies mesoscale-level organizational features: ROI groups and* 312 *processing streams*

313 Hierarchical clustering was applied to the first four dimensions of the embedded gamma band  
314 data shown in Figure 3. The analysis illustrated a mesoscale organization of cortical ROIs (Fig. 4)  
315 that aligned with the qualitative observations discussed above. As with any clustering scheme,  
316 the number of clusters is difficult to determine based on the data alone. In the left column of  
317 Figure 4a, we illustrate two possible thresholds yielding 5 and 9 clusters, respectively. In the 5-  
318 cluster scheme, auditory cortical ROIs (excluding PP) formed an ‘Auditory’ cluster with STSU at  
319 one end of the dendrogram. At the other end, sensorimotor ROIs and ROIs typically considered  
320 part of the dorsal auditory stream formed clusters (labeled ‘Action’ and ‘Dorsal’, respectively).

321 The remaining two large clusters were dominated by ventral temporal and limbic ROIs and by  
322 prefrontal and mesial ROIs (colored green and blue, respectively).

323 At a lower threshold, a 9-cluster scheme emerged. The ventral temporal/limbic cluster divided  
324 into three distinct clusters. One of these ('Limbic') included ROIs traditionally considered part of  
325 the limbic system [parahippocampal gyrus (PHG), amygdala and hippocampus], as well as TP  
326 and the insula. A second ('Visual') included ROIs in the ventral visual stream, and a third  
327 ('Ventral') consisted of ROIs typically considered part of the ventral auditory stream. Similarly,  
328 the prefrontal cluster divided into three distinct clusters ('Ventromedial prefrontal', 'Lateral  
329 prefrontal', and 'Executive'). Thus, the hierarchical clustering analysis revealed a segregation of  
330 ROIs in embedding space that aligned with known functional differentiation of brain regions.  
331 Further, we can use this analysis to expand our understanding of hierarchical relationships  
332 among clusters. For example, the 'Auditory' cluster was distinct from other clusters primarily in  
333 the temporal lobe, but is closer to the 'Limbic' cluster than 'Ventral' or 'Visual'.

334 Results of hierarchical agglomerative clustering applied to data from all five frequency bands  
335 are shown in Supplementary Figure 6. The color scheme for the ROIs is based on the gamma  
336 band results to provide a reference for similarity and difference across bands. Auditory cortical  
337 ROIs consistently clustered together, though the specific membership of that cluster varied  
338 slightly in alpha- and beta bands. Sensorimotor ROIs consistently clustered together, usually at  
339 a considerable distance from auditory ROIs, though in high gamma band dorsal and ventral  
340 sensorimotor ROIs were separated. Prefrontal and mesial ROIs tended to cluster together in all  
341 bands, albeit at variable overall position relative to auditory and sensorimotor ROIs. PP tended  
342 to cluster with anterior temporal lobe structures, and TP with limbic structures, regardless of  
343 frequency band. Thus, the temporal scale of neuronal signaling contributes importantly to  
344 establishing the structure of functional networks, consistent with previous results[10, 11, 80-  
345 82].

346 We evaluated the robustness of this clustering scheme in our dataset by calculating stability as  
347 the median normalized Fowlkes-Mallows index[83] across bootstrap iterations. The index varies  
348 between 0 (random clustering across iterations) and 1 (identical clustering across iterations).  
349 The results of the analysis as a function of threshold and frequency band indicated that stability  
350 was not strongly dependent on either band or threshold, especially for 5 or more clusters  
351 (Supplementary Fig. 7a). We also calculated cluster-wise stability as a function of the number of  
352 clusters for gamma band using the Jaccard coefficient[84]. Stability varied across threshold and  
353 clusters (Supplementary Fig. 7b). Notably, the auditory cluster was the most stable for gamma  
354 band data for both the  $n_{clust} = 5$  and 9 results illustrated in Figure 4. By contrast, the 'Executive'  
355 cluster for  $n_{clust} = 9$  was the least stable of the group.

356 In addition to these resting state recordings, most participants engaged in additional  
357 experiments investigating representation of acoustic stimuli in the brain[23, 85-87]. We used  
358 these data to evaluate auditory responsiveness of each recording site (Fig. 4a, right column)  
359 and compare these response profiles to the clustering results of Figure 4a (left column). As

360 expected, ROIs in the auditory cluster exhibited consistently high responsiveness to auditory  
 361 stimuli, while visual ROIs did not. By contrast, some clusters exhibited mixed responsiveness  
 362 (e.g. InsP in the limbic cluster), possibly indicating ROIs that serve as nodes bridging auditory  
 363 and other brain networks.

364 A brain parcellation scheme based on the gamma band clustering results is illustrated in Figure  
 365 4c. We note that as for other parcellation schemes based on functional connectivity (e.g., [2,  
 366 88]), the specific threshold that is most relevant and useful depends on the questions being  
 367 asked and the sample size available for hypothesis testing.

368

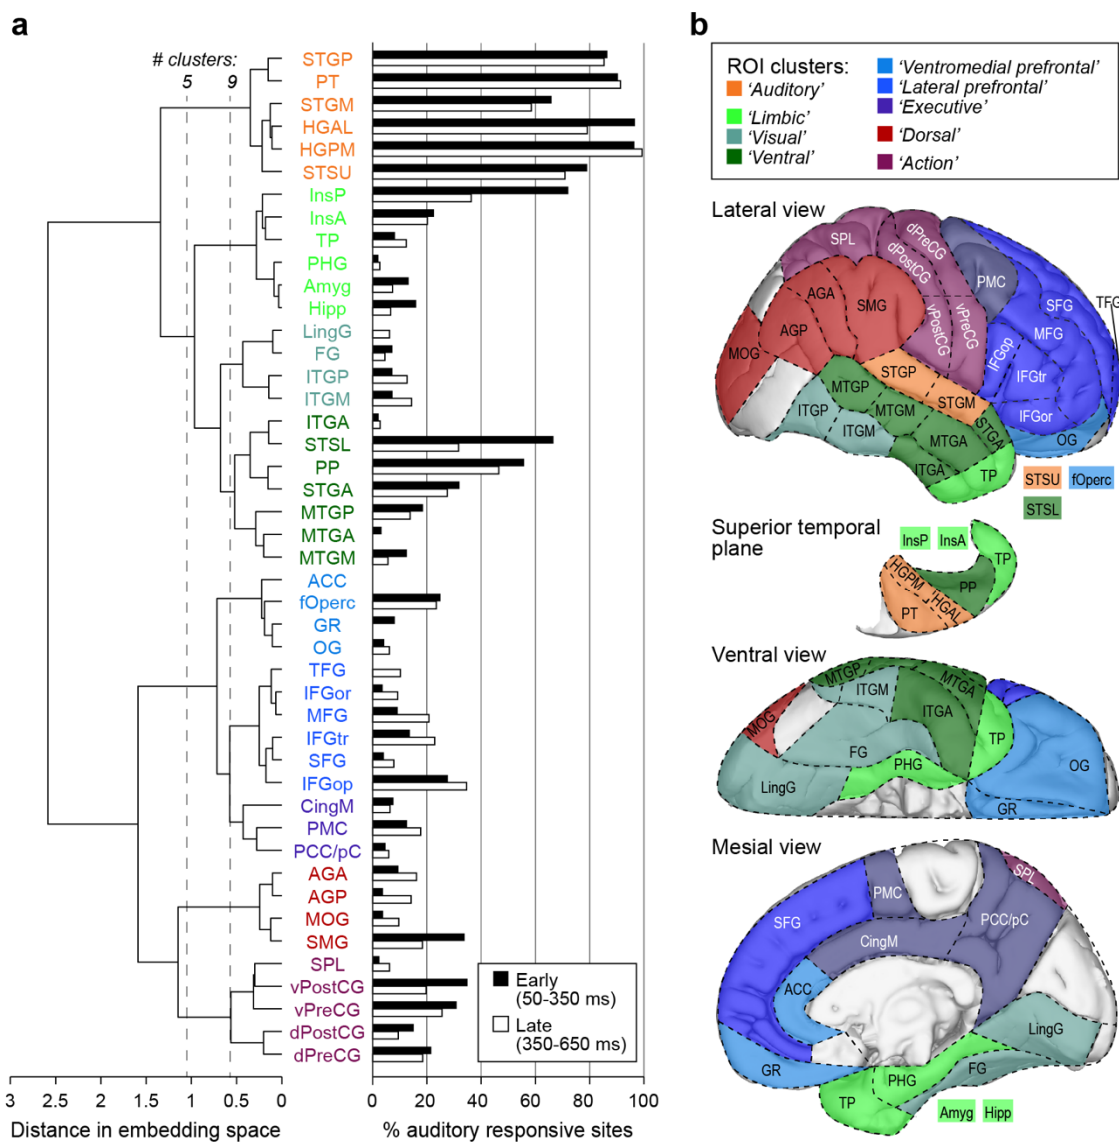

369

370 **Figure 4.** Hierarchical clustering of embedding data shown in Figure 3. **a:** Linkages between ROI groups  
 371 identified using agglomerative clustering. Two thresholds are denoted (vertical dashed lines), one



372 yielding 5 clusters and one yielding 9. ROIs are colored to indicate cluster membership. **b**: Auditory  
373 responsiveness in each ROI. Shown are percentages of sites in each ROI with early (50-350 ms after  
374 stimulus onset; black bars) and late (350-650 ms; white bars) high gamma responses to 300 ms  
375 monosyllabic words. **c**: Brain parcellation based on hierarchical clustering illustrated in **a**.

376 *DME identifies mesoscale topological features of cortical networks*

377 In a network, ‘global hubs’ integrate and regulate information flow by virtue of their centrality  
378 and strong connectivity; spokes send and receive information to/from these hubs. Identification  
379 of these nodes is critical for understanding the topology of brain networks [89], yet there is  
380 ongoing debate about effective methods for identifying hubs and spokes[90]. Here, we propose  
381 a novel approach to use DME to identify global hubs versus spokes. First, we note that the  
382 closer an ROI is to the center of the data cloud in embedding space, the more equal is its  
383 connectivity to the rest of the network. A simulated example is illustrated in Figure 5a, which  
384 depicts a network of five ROIs, with one serving as a global hub (Fig. 5a, left panel, green). The  
385 network structure can also be represented as an adjacency matrix, wherein the hub ROI has  
386 strong connectivity with other ROIs (Fig. 5a, middle panel). In embedding space, this ROI  
387 occupies a central location, with the other four serving as spokes, i.e., nodes that interact with  
388 each other through the central hub (Fig. 5a, right panel).

389 However, a node’s proximity to the center of the data cloud reflects the *homogeneity* of its  
390 connectivity to the rest of the network, not necessarily the strength of that connectivity. In  
391 theory a node could appear at a central location if it is weakly but consistently connected to all  
392 other nodes. To determine whether this occurs in our dataset, we computed the Euclidean  
393 distance from the center of embedding space and mean connectivity for all of the ROIs in Figure  
394 3b. We show in Figure 5b a strong inverse relationship between these two measures. ROIs close  
395 to the center of embedding space also exhibited strong mean connectivity, suggesting that  
396 global hubs can be identified in these data using distance from the center of embedding space  
397 alone.

398 The identity of global hubs, and the extent to which specific nodes act as global hubs, varied  
399 across frequency bands. In the high gamma and gamma bands, ROIs presenting most strongly  
400 as global hubs included MTGA, STGA, and MTGM. ITGA, CingM, posterior cingulate/precuneus  
401 (PCC/pC), PP, fOperc, and STSL also exhibited hub-like properties. By contrast, the ROIs that  
402 were farthest from the center of embedding space were mostly unimodal sensory and motor  
403 regions, consistent with their roles as spokes in the network. The positioning of these ROIs in  
404 embedding space and their roles as spokes are also indicated by the position of these ROIs at  
405 the edges of the 1-D representation depicted in the dendrograms of Figure 4 and  
406 Supplementary Figure 6.

407 In lower frequency bands, by contrast, CingM along with MTGM, InsP, and InsA, presented  
408 most strongly as global hubs, with the addition of ACC in the theta band. These results are  
409 consistent with network organization depending on temporal scale, and suggests that mesial  
410 cortical structures regulate information flow on slower time scales, consistent with previous  
411 reports[10]. Thus, DME can identify band-specific topological features critical to information  
412 flow within cortical networks.

413

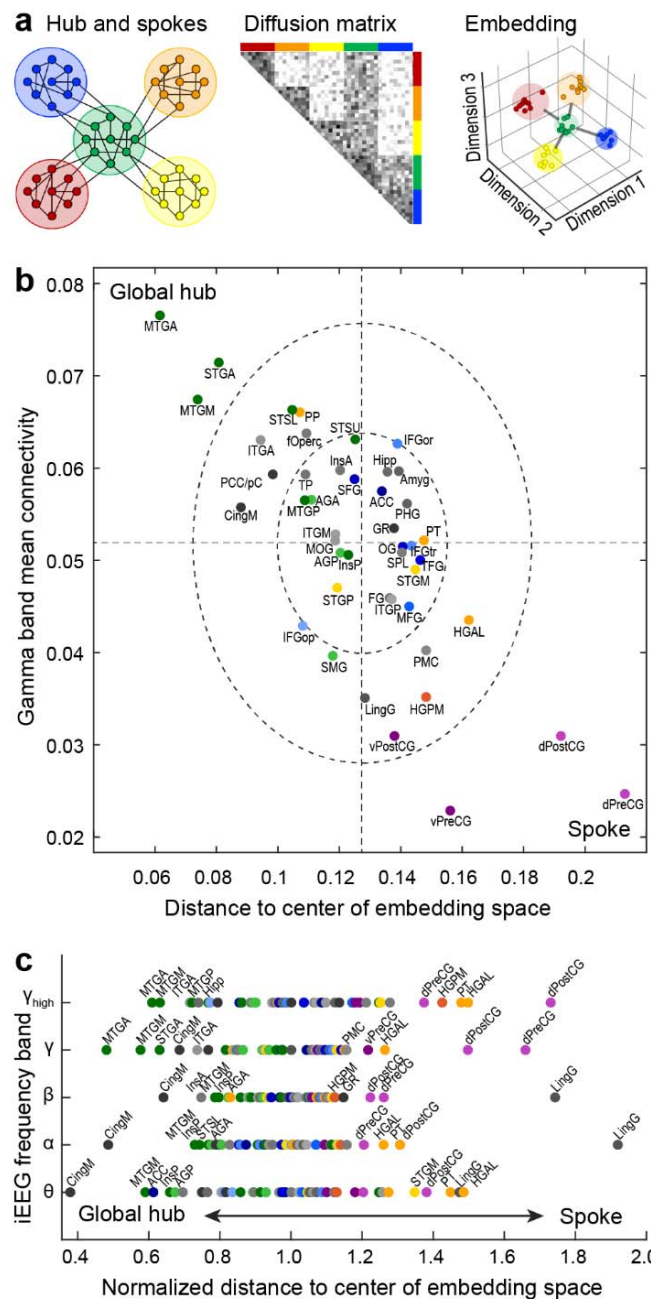

414

415

416 **Figure 5.** Identification of network hubs. **a:** Schematic example illustrating the central positioning of  
 417 global hubs in embedding space. **b:** ROIs from average embedding are plotted according to their mean  
 418 connectivity to the rest of the network versus their Euclidean distance to the centroid of the data cloud  
 419 in the first four dimensions of embedding space. Dashed lines denote across-ROI means. Dashed ellipses  
 420 represent 1 and 2 standard deviations from the mean. **c:** Distance to center of embedding space for  
 421 each ROI in the five studied frequency bands. Distances are normalized to the median distance within  
 422 each band to allow for comparison across bands.

423 *Differences between language-dominant and non-dominant hemispheres are not specific to*  
424 *auditory-responsive and language-specialized ROIs*

425 On a macroscopic scale, speech and language networks are lateralized in the human brain, with  
426 nearly all right-handed and most left-handed individuals left hemisphere language-  
427 dominant[91]. However, both hemispheres are activated during speech processing[33, 39, 56,  
428 92], and the extent to which lateralization is reflected in asymmetries in the organization of  
429 resting state auditory networks is unclear. We hypothesized that that we would observe  
430 asymmetry in gamma band data, specifically that ROIs would be in different positions in  
431 embedding space in the language-dominant versus non-dominant hemisphere. We investigated  
432 this issue by comparing the functional geometry of cortical networks derived from participants  
433 with electrode coverage in the language-dominant ( $N = 24$ ) versus non-dominant ( $N = 22$ )  
434 hemisphere. ROIs in the two hemispheres exhibited a similar functional organization in  
435 embedding space (Supplementary Fig. 8). Permutation analysis indicated that for gamma band,  
436 the positions of ROIs in embedding space were not significantly different between dominant  
437 and non-dominant hemispheres (all  $p$ -values  $> 0.05$ ). Furthermore, there was no significant  
438 correlation between the change in position in embedding space and either early or late  
439 auditory responsiveness (early:  $p = 0.94$ ; late:  $p = 0.86$ ; Fig. 6a). Similar results were obtained in  
440 exploratory analyses of beta band data, though one ROI (MTGP,  $p = 0.013$ ) did survive false  
441 discovery rate (FDR) correction for difference in position between the two hemispheres.

442 We also analyzed inter-ROI distances to determine whether functional interactions between  
443 ROIs were different in the two hemispheres. For gamma band, pairwise inter-ROI distances in  
444 embedding space, calculated separately for dominant versus non-dominant hemisphere, were  
445 highly correlated ( $r = 0.88$ ), with no obvious outliers (Fig. 6b, left panel). The data shown in  
446 Figure 6a have a slope  $< 1$ , indicating that inter-ROI distances are consistently longer in the  
447 dominant hemisphere compared to the non-dominant hemisphere ( $p = 0.0032$ ). This  
448 multiplicative scaling of the distances is consistent with the data occupying a larger volume in  
449 embedding space for the dominant versus non-dominant hemisphere, suggesting a greater  
450 functional heterogeneity for the language-dominant side of the brain. After accounting for this  
451 multiplicative scaling effect, following FDR correction, there were no specific inter-ROI  
452 distances that were significantly different between the two hemispheres. Similar results were  
453 obtained in exploratory analyses of beta band data (pairwise inter-ROI distances  $r = 0.79$ ; longer  
454 inter-ROI distances in dominant hemisphere  $p = 0.0071$ ; no pairwise distances significant after  
455 FDR correction).

456 When considering ROIs specifically involved in speech and language comprehension and  
457 production [PT, PP, STSL, STGP, STGM, STGA, SMG, AGA, premotor cortex (PMC), precentral  
458 gyrus (PreCG), IFGop, IFGtr][36, 42, 93], the correlation in pairwise inter-ROI distances in  
459 embedding space was also high ( $r = 0.90$ ; Figure 6b). Furthermore, the data in Figure 6b  
460 exhibited a similar multiplicative scaling as observed for all the ROIs shown in Figure 6a. Indeed,  
461 the slope for the data in Figure 6b was indistinguishable from the slope for the data in Figure 6a

462 ( $p = 0.93$ ). Similar results were obtained in exploratory analyses of beta band data (pairwise  
463 inter-ROI distance correlations  $r = 0.76$ ; difference between speech and language ROIs versus  
464 others  $p = 0.35$ ). Thus, hemispheric asymmetry of functional organization specific to speech and  
465 language networks was not detectable in RS connectivity.

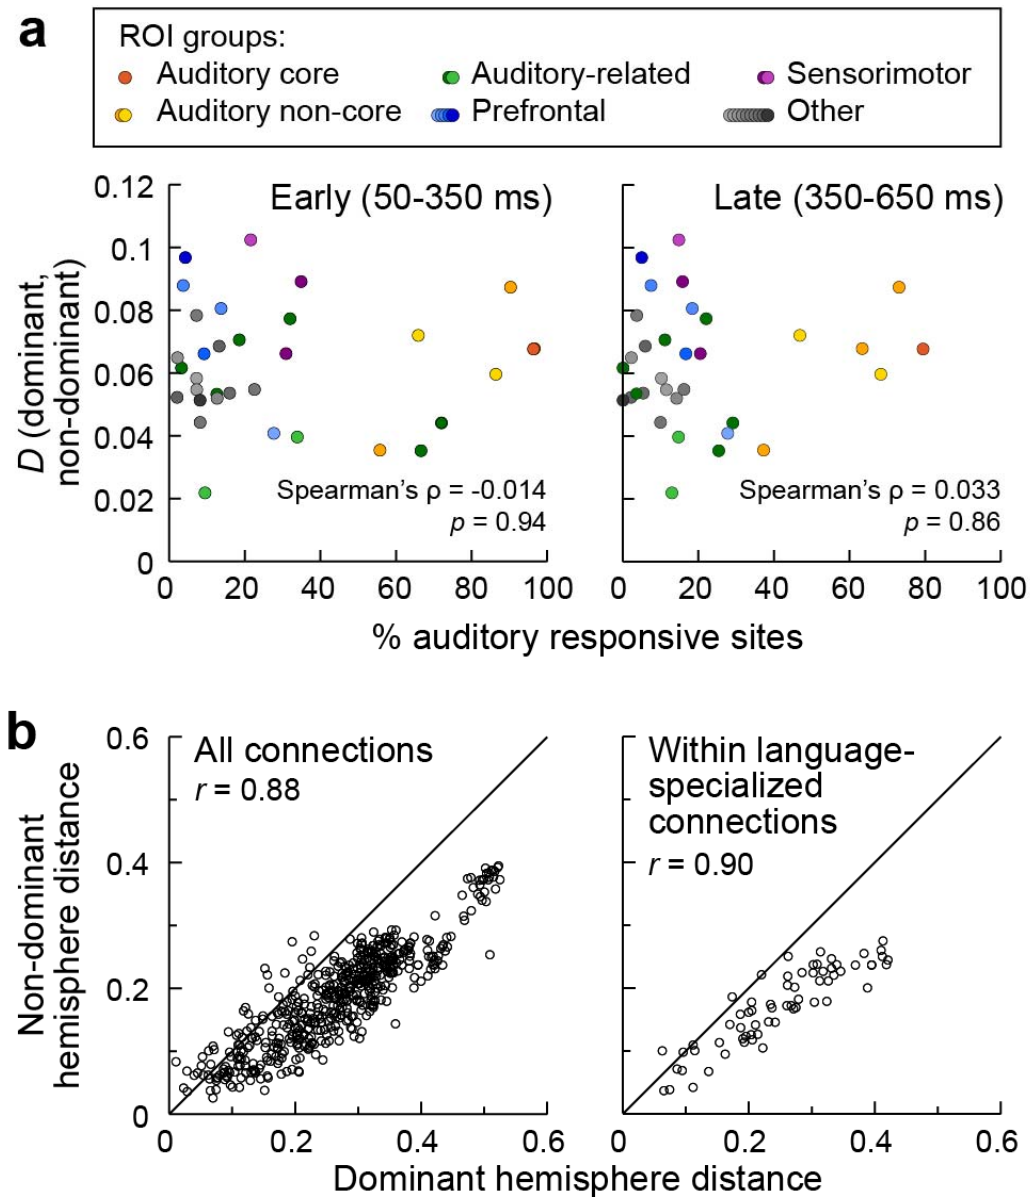

466

467

468 **Figure 6.** Hemispheric asymmetries in RS connectivity are not driven by auditory-responsive and  
469 language-specialized ROIs. Inter-ROI distances in embedding space for non-dominant versus dominant  
470 hemisphere participants. **a:** Comparison between the change in position in embedding space from  
471 dominant to non-dominant hemisphere and the auditory responsiveness of individual ROIs. Two-tailed  
472 Spearman's rank tests did not reveal a significant correlation between ROI asymmetry and percentage of  
473 either early or late auditory responsive sites within the ROI (left and right panel, respectively). **b:**

474 Pairwise distances between all ROIs and between ROIs involved in speech and language perception and  
475 production (PT, PP, STSL, STGP, STGM, STGA, SMG, AGA, PMC, PreCG, IFGop, IFGtr) are shown in the left  
476 and right panel, respectively. Note that after splitting the data into the two subsets (dominant and non-  
477 dominant) STSU did not meet the inclusion criteria for analysis presented in the right panel (see  
478 Methods, Supplementary Table 2).

479 *Comparison to embeddings derived from RS-fMRI data*

480 So far, we've presented results at multiple spatial scales based on intracranial  
481 electrophysiology. However, these intracranial recordings sample the brain non-uniformly and  
482 sparsely as dictated by clinical considerations. This feature presents problems at two spatial  
483 scales: first, cortical regions are not sampled uniformly (with some not sampled at all). Second,  
484 ROIs are not sampled uniformly across their volume. To examine the impact of these sampling  
485 issues, we compared iEEG-based DME to DME applied to RS-fMRI data available in a subset of  
486 ten participants.

487 We first tested the consistency of functional geometry derived from the two modalities in the  
488 same participants (Fig. 7). Connectivity matrices were constructed based on RS-fMRI data from  
489 voxels located at iEEG recording sites and grouped into the same ROIs as in Figure 1. The iEEG  
490 and fMRI embeddings averaged across participants were qualitatively similar (Fig. 7a, b), and  
491 the overall organization derived from this subset was consistent with that observed in the full  
492 iEEG dataset (cf. Fig. 3b). Inter-ROI distances in the fMRI and iEEG embedding spaces were  
493 correlated (Fig. 7c). These correlations varied across band, with highest correlations for gamma  
494 and high gamma band envelopes ( $r > 0.45$ ; Fig. 7d, line and symbols), consistent with previous  
495 reports[80, 94].

496 The analysis presented in Figure 7 provide a context for using fMRI data to address questions  
497 regarding the effects of limited, non-uniform sampling. We used a standard parcellation  
498 scheme developed for fMRI data (Schaefer-Yeo 400 ROIs;[88]) rather than the iEEG parcellation  
499 scheme introduced in Figure 1.

500 The first question we addressed was the effect of non-uniformly sampling only a subset of brain  
501 regions. For each participant, embeddings were derived from RS-fMRI connectivity matrices  
502 computed from all cortical ROIs (Fig. 8a, "Full fMRI", first column). From these embeddings, we  
503 selected only points in embedding space corresponding to ROIs sampled with iEEG (Fig. 8a, "Full  
504 fMRI (iEEG subset)", second column). We also computed embeddings for each subject from  
505 only the fMRI ROIs sampled with iEEG in that subject ["Partial fMRI (ROI level)", Fig. 8a, 3rd  
506 column]. We compared these embeddings to the "Full fMRI (iEEG subset)" embeddings by  
507 computing the correlation between inter-ROI distances (Fig. 8b). Although the scale of the  
508 embeddings was different for the full fMRI versus partial fMRI data (because the number of  
509 dimensions was different), the two were highly correlated (median  $r = 0.90$ ; Fig. 8c). Thus,  
510 embeddings constructed from the portion of the brain sampled by iEEG were quite similar to  
511 embeddings derived from the whole brain.

512 The second question we addressed was the effect of representing an entire ROI by sparse  
513 sampling with a limited number of electrodes. We computed embeddings from the voxel  
514 averages across entire ROIs in each participant ["Partial fMRI (ROI level)", Fig. 8a, 3rd column]  
515 and from averages of the voxels in grey-matter spheres around iEEG recording sites ["Partial

516 fMRI (site level)”, Fig. 8a, rightmost column]. ROI- and site-level embedding distances were  
517 strongly correlated (median  $r = 0.65$ ; Fig. 8c).

518 Thus, sparse sampling within an ROI had a greater impact on estimates of functional geometry  
519 than limited sampling of the complete set of ROIs. Overall, however, ROIs were faithfully  
520 represented in embedding space even when DME was based on a small number of locations  
521 within ROIs. Taken together, these results indicate broad consistency between functional  
522 organization derived from iEEG and fMRI and the robustness of this approach to sparse  
523 sampling afforded by iEEG recordings.



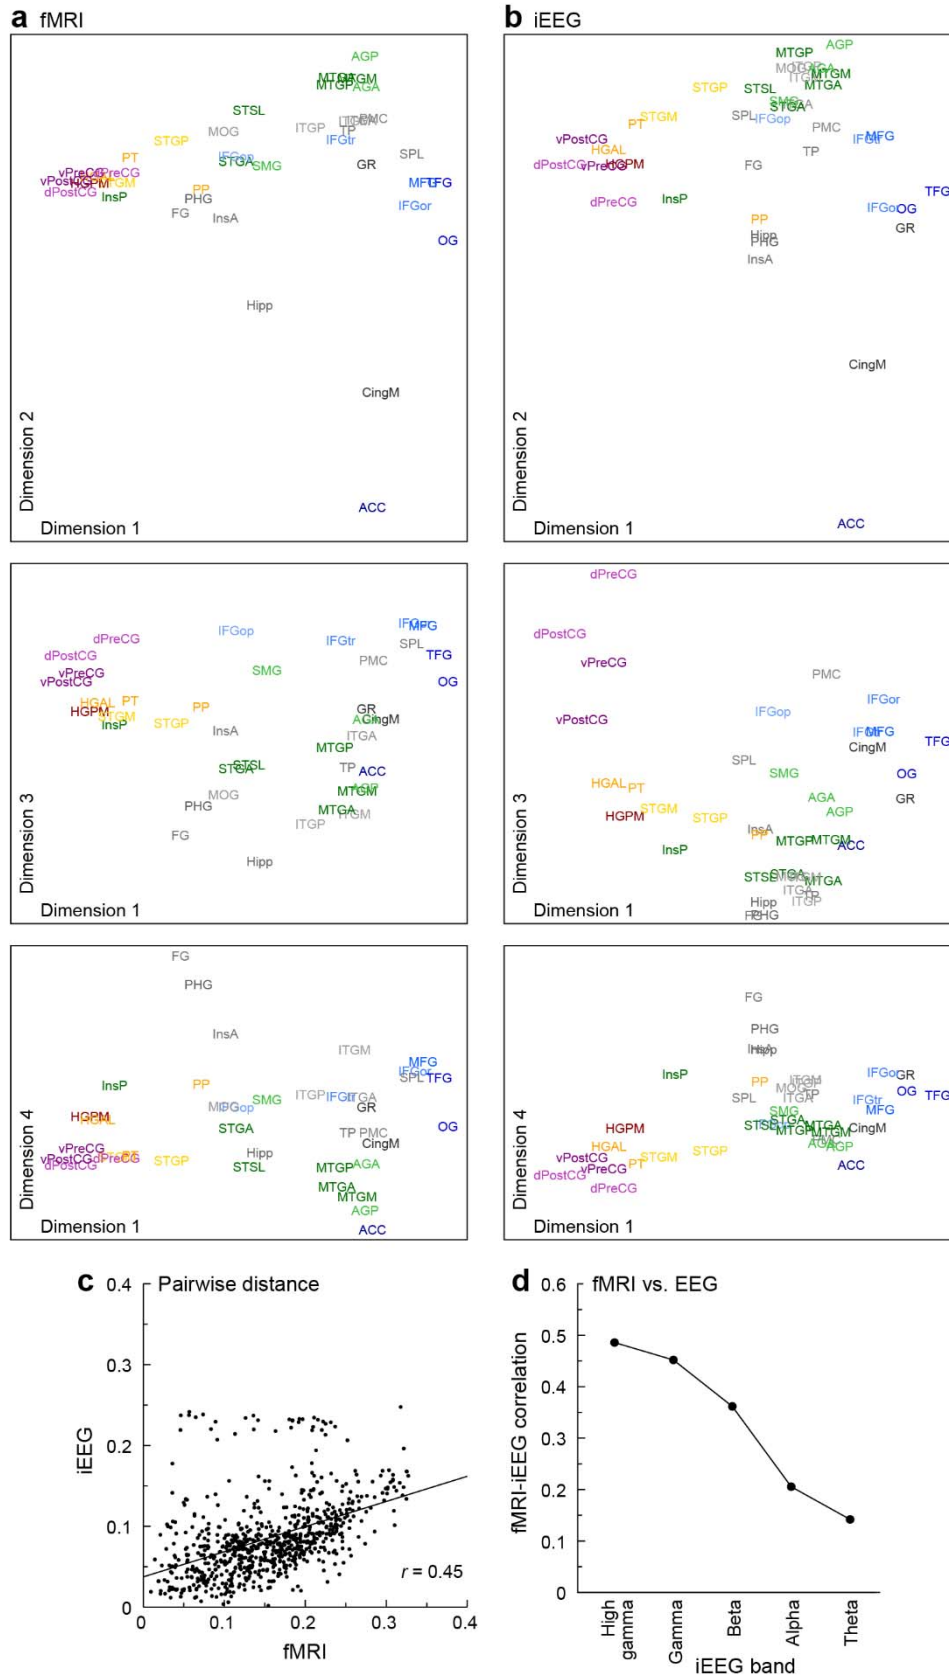

525 **Figure 7.** Comparison of iEEG and fMRI connectivity data in embedding space. **a:** Participant-averaged  
526 embeddings for iEEG (gamma band power envelope correlations). **b:** Participant-averaged embeddings  
527 for fMRI. **c:** Inter-ROI embedding distances computed from the data in **a** and **b**. **d:** Summary of distance  
528 correlations at each frequency band.

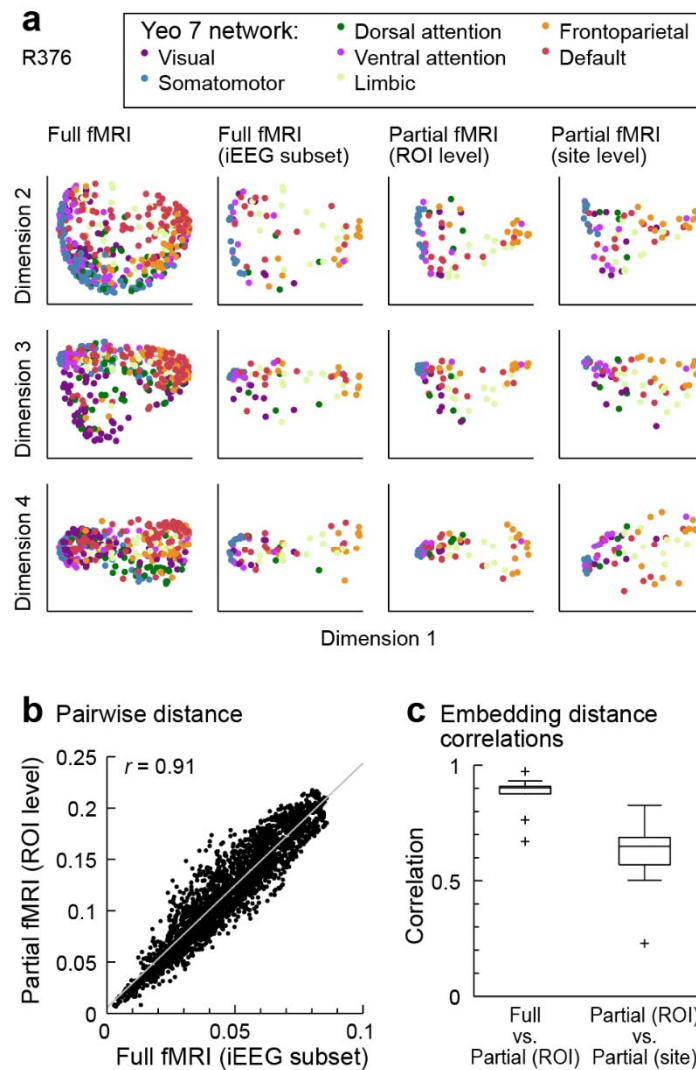

529

530

531 **Figure 8.** Comparison of embeddings derived from full fMRI connectivity matrices and connectivity  
 532 matrices computed using only ROIs sampled with iEEG. **a:** Data in the first four dimensions of embedding  
 533 space for a single participant. Shown are embeddings of all derived from the full RS-fMRI connectivity  
 534 matrix (1st column); the subset of the data points in the 1st column corresponding to ROIs sampled via  
 535 iEEG (2nd column); and embeddings derived from connectivity matrices including *only* the ROIs sampled  
 536 via iEEG, calculated by averaging across the entire ROI (3rd column), and calculated based on the specific  
 537 recording sites in that participant (4th column). **b:** Comparison of embedding distances calculated from  
 538 the full fMRI embedding (i.e., data in **a**, 2nd column) versus distances calculated from the partial fMRI  
 539 embedding (i.e., data in **a**, 3rd column). **c:** Summary across participants of distance correlations between  
 540 full fMRI embeddings versus partial embeddings calculated based on the entire ROI (left: “Full vs. Partial  
 541 (ROI)”) and between partial embeddings calculated based on the entire ROI versus those calculated  
 542 based on recording sites [*i* “Partial (ROI) vs. Partial (site)”].

## 543 **Discussion**

### 544 *Organization of auditory cortical networks*

545 We have shown that DME applied to iEEG data can be used to characterize the organization of  
546 the human auditory cortical hierarchy at multiple spatial scales. We demonstrate methodology  
547 for testing specific hypotheses about gamma band data at each of these scales using DME. We  
548 also use exploratory analyses (e.g., hierarchical clustering, analyses of other frequency bands)  
549 to generate data-driven hypotheses for study using future data sets.

550

### 551 *Investigating cortical network organization using resting state data*

552 The results presented here are based on analysis of resting state (i.e., task-free) data.  
553 Relationships between brain signals recorded at different locations derive from synaptic  
554 connections between neurons in those locations. Thus, these data provide valuable information  
555 about the underlying brain organization despite the absence of a task or a controlled sensory  
556 stimulus. The same areas that are co-activated during sensory processing exhibit resting state  
557 connectivity with each other, and resting state networks map onto relevant behavioral and  
558 task-related domains [2, 3]. Numerous previous studies based on BOLD fMRI have used  
559 analyses of resting state activity to gain insight into the organization of human brain networks  
560 and how this organization is altered due to brain disorders, during development and ageing,  
561 and in response to pharmacological treatments [22, 26, 95-99].

562 A key advantage of resting state analyses is that they are based data that is far more stationary  
563 compared to data derived from task-based experiments. In the case of sensory regions, this  
564 avoids a confound inherent to investigations of connectivity in the presence of a stimulus,  
565 which itself would produce correlated activity at directly driven sites. That is, two unconnected  
566 sites in the brain driven by the same sensory stimulus will exhibit apparent connectivity solely  
567 due to the stimulus, in the absence of a physical connection between the sites. Additionally,  
568 resting state analyses typically can draw on considerably more data than is available from task-  
569 based experiments, allowing for better estimates of connectivity.

570 As in previous studies, we provide a snapshot of the organization of these networks,  
571 corresponding to a static representation. However, these networks are dynamic due to short-  
572 and long-term plasticity driven both by internal (e.g., changes in arousal state) and external  
573 factors (e.g., sensory stimulation and directed behavior). The organization derived from studies  
574 such as this one provides a framework for understanding these dynamics.

575

### 576 *Frequency band-specific properties of cortical networks*

577 Previous reports have shown that cortical networks defined by functional or effective  
578 connectivity derived from electrophysiological data exhibit organizational structure that

579 depends on the frequency band being analyzed. This manifests in two ways relevant to the  
580 results presented here. First, canonical resting state networks originally identified using resting  
581 state BOLD fMRI data vary across band in the strength of within-network connectivity and in  
582 the relationship between electrophysiological- and fMRI-derived connectivity networks [10, 80].  
583 Second, detailed analyses of the relationship between anatomical projection patterns and  
584 functional or effective connectivity indicate that especially in auditory and visual cortical  
585 hierarchies, feedforward information streams rely on connectivity primarily in gamma and high-  
586 gamma bands, while lower frequency bands (alpha, beta) underlie feedback connectivity[11-  
587 19]. Based on these previous reports, we suggest that the gamma band organization that is the  
588 focus of the current report reflects feedforward connectivity. Indeed, the auditory  
589 responsiveness profile depicted in Figure 4b is most strongly predicted by clustering analysis  
590 applied to gamma and high-gamma band data in embedding space. Results for other bands  
591 differed from gamma band results especially in the identity of network hubs (Figure 5), where  
592 middle cingulate cortex emerged as the ROI with the most pronounced ‘hubness’. By contrast,  
593 the overall organization features considered at various spatial scales did not differ strongly  
594 between bands, suggesting that while temporal scale is an important contributor to network  
595 organization, functional connectivity on these different scales tends to overlap. In the case of  
596 comparisons between feedforward and feedback networks, this is consistent with the tendency  
597 of cortical areas to be coupled bidirectionally[100].

598

#### 599 *Fine scale: Organization of auditory cortex*

600 At a fine spatial scale, previous work in non-human primates has defined over a dozen auditory  
601 cortical fields based on cytoarchitectonics, connectivity, and response properties[101]. By  
602 contrast, there is no consensus on how auditory cortex is organized in humans, with multiple  
603 parcellations based on cytoarchitectonics, tonotopy or myeloarchitecture[102-105]. Our results  
604 contribute to this body of knowledge by showing that several superior temporal ROIs including  
605 core auditory cortex (HGPM) and putative auditory belt and parabelt areas (PT, HGAL,  
606 STGM)[102, 105] group together in embedding space across all frequency bands. Thus, in spite  
607 of their diversity in processing of specific features of acoustic signals, these ROIs are positioned  
608 at a similar level in the auditory cortical hierarchy. Other regions, such as STGP and STSU, group  
609 with these cortical ROIs in theta, gamma, and high-gamma, but not in alpha and beta. For  
610 gamma band, proximity of STGP and STGM to HGPM in embedding space is consistent with  
611 previous studies that interpret these regions as relatively early non-core auditory cortex[29,  
612 106, 107]. By contrast, although PP is anatomically close and connected to HGPM[108], for both  
613 gamma and beta band it was not close to HGPM in embedding space. PP is distinguished among  
614 auditory cortical regions for its syntactic-level language processing[30] and its preferential  
615 activation by music, which has a strong affective component[31]. This functional differentiation  
616 is reflected in its segregation from the group of auditory cortical ROIs in embedding space.

617

618 *Fine scale: Functional differentiation between STSU and STSL*

619 The superior temporal sulcus is a critical node in speech and language networks linking  
620 canonical auditory cortex with higher order temporal, parietal, and frontal areas[22, 33-37].  
621 Previous studies have shown that STSU and STSL differ in cytoarchitecture[109] and have  
622 distinct responses to speech[27, 57, 110, 111]. A recent iEEG study demonstrated enhanced,  
623 shorter-latency responses to speech syllables in STSU compared to STSL[23]. STSU is  
624 traditionally not considered part of canonical auditory cortex (but see[103]), yet it was located  
625 close to auditory cortical ROIs in embedding space in gamma band. STSL, by contrast, was  
626 closer in embedding space to semantic ROIs in both beta and gamma band. This is consistent  
627 with iEEG evidence that responses in STSL, but not STSU, correlated with performance on a  
628 semantic categorization task[23]. The regions specifically involved in semantic processing is a  
629 current topic of debate, with multiple competing models[21, 76-78]. We defined a list of  
630 semantic processing regions by combining across these models. Taken together, the results  
631 firmly place STSU and STSL at different levels of the auditory cortical hierarchy defined by  
632 gamma band connectivity.

633 *Mesoscale: Functional and theoretical framework of a limbic auditory pathway*

634 Multiple lines of evidence support a pathway linking auditory cortical and limbic structures[112-  
635 115] that subserves auditory memory[45, 48, 49] and affective sound processing[116]. The data  
636 presented here contribute to our understanding of this pathway. Clustering analysis identified a  
637 set of ROIs including structures classically labeled as limbic (PHG, Amy, Hipp) as well as insula  
638 (InsP, InsA) and TP positioned close to the auditory cluster in embedding space for both gamma  
639 and beta bands (Fig. 4; Supplementary Fig. 4). This suggests a close functional relationship that  
640 could form the basis for a limbic stream. InsP, with strong auditory responsiveness and  
641 overlapping response properties with HGPM, is likely involved in the transformation of auditory  
642 information in auditory cortex to affective representations in InsA[32]. Thus, InsP could serve as  
643 critical linking node between auditory and limbic structures.

644 TP is involved in semantic processing[21, 30] and auditory memory[117], in particular the  
645 representation and retrieval of memories for people, social language, and behaviors ('social  
646 knowledge')[118]. Tight clustering of TP with limbic ROIs in embedding space is consistent with  
647 its previously reported functional association with limbic cortex[119, 120], with which TP shares  
648 key features of laminar cytoarchitecture and strong connectivity[121]. We suggest that the  
649 organization depicted in Figures 3 and 4, combined with evidence for bidirectional information  
650 sharing between auditory cortex and limbic areas, merits the identification of a third auditory  
651 processing stream alongside the dorsal and ventral streams[38, 122]. This 'limbic stream' would  
652 underlie auditory contributions to affective and episodic memory processing.

653

654 *Mesoscale: Ventral and dorsal streams linking auditory and frontal cortex*

655 Current models of speech and language processing posit the existence of ventral and dorsal  
656 processing streams linking non-core auditory cortex with PMC and inferior frontal gyrus via  
657 several distinct anatomical pathways encompassing temporal, parietal, and frontal cortex[36,  
658 38-40]. Despite substantial experimental evidence supporting these models, there is a lack of  
659 consensus on the specific functions subserved by the two streams. For example, while there is  
660 consensus that the ventral stream subserves auditory object identification (“what” processing),  
661 the dorsal stream has been envisioned to subserve spatial processing (“where”[38]) and  
662 audiomotor processing[39]. There is a parallel debate about the specific cortical regions  
663 comprising the two streams.

664 As broadly predicted by these models, temporal and parietal ROIs segregated in embedding  
665 space in the analysis presented here (Fig. 3b, 4; Supplementary Figs. 4 & 6). Across frequency  
666 bands, we observed a cluster that included STSL and ATL ROIs, in conformity with the ventral  
667 auditory stream proposed by Hickok and Poeppel[39] and Friederici[40]. By contrast, the cluster  
668 that included SMG, AGP, and AGA aligned with the dorsal processing stream as proposed by  
669 Rauschecker and Scott[38]. The proximity of these dorsal ROIs to sensorimotor ROIs is  
670 consistent with sensorimotor contributions to dorsal stream processing[43, 123]. Association of  
671 FG and MOG with the ventral and dorsal clusters, respectively, likely represents the sharing of  
672 information across sensory modalities. For example, visual information has been shown to  
673 contribute to processing in the ventral (“what”) pathway[124, 125].

674 A previous fMRI-based DME study found that primary sensory and default mode ROIs  
675 segregated along the first dimension in embedding space[25]. Coverage of mesial cortex in our  
676 dataset was limited, precluding a direct comparison. However, the striking separation between  
677 auditory and prefrontal cortex in embedding space shown here indicate that the current results  
678 align well with the previous report. This separation places auditory and frontal regions at  
679 opposite ends of a cortical hierarchy, linked by ventral and dorsal processing streams[38-40].

680

681 *Mesoscale: Network hubs*

682 Hubs in brain networks play a critical role in integrating distributed neural activity[89, 126]. In  
683 the present analysis, global hubs were characterized by their central location within embedding  
684 space (Fig. 5). In the gamma band, these hubs included STGA and MTGA, both components of  
685 the ATL. Previous reports indicate that ATL serves as a transmodal hub, transforming sensory  
686 domain-specific to domain-general representations[21, 127, 128] and playing a central role in  
687 semantic processing and social memory[21, 118, 129]. MTGM also appears as a global hub,  
688 even though it is anatomically distinct from the ATL. Interestingly, patients with semantic  
689 dementia have ATL degeneration[130, 131], but the damage is often more widespread and can  
690 include MTGM[132].

691 Cingulate cortical ROIs (CingM, ACC) and insula were identified as hubs in lower frequency  
692 bands. CingM and ACC are described as transmodal and are active during a wide array of  
693 emotional and cognitive processes[133, 134], both consistent with their previous  
694 characterization as network hubs[126]. The identification of hubs specific to each frequency  
695 band supports the model in which the temporal scale of communication in the brain supports  
696 distinct functional networks[80-82, 135]. Also consistent with this model is the frequency band-  
697 specific correspondence between iEEG and fMRI connectivity observed here (Fig. 7d) and in  
698 previous reports[80, 94]. Strong correspondence between BOLD fMRI connectivity and higher  
699 frequency band envelope correlations in iEEG are observed, while the correspondence for theta  
700 and alpha bands is usually still positive but lower in magnitude. Of note, this frequency  
701 dependence of connectivity is distinct from previous observations of a frequency-dependent  
702 correspondence between iEEG power and BOLD fMRI signal magnitude[136]. This relationship  
703 for connectivity also depends on brain location[80]. Because we did analyze the relationship  
704 between fMRI and iEEG in a region-specific manner, the results presented here represent an  
705 average analysis over all sampled brain regions.

706 Unlike other ATL structures, TP does not present as a global hub in any frequency band (Fig. 5c).  
707 The close association of TP with limbic structures in embedding space suggests that TP  
708 mediates interactions between transmodal integration centers in the ATL and structures  
709 subserving memory functions. More broadly, the heterogeneity of ATL ROIs in terms of their  
710 global hub-like connectivity profiles conforms to the observation that the terminal fields of  
711 white matter tracts converging in the ATL only partially overlap[21, 137, 138].

712

### 713 *Macroscale: Hemispheric lateralization*

714 Although speech and language networks are classically described as highly lateralized, imaging  
715 studies have demonstrated widespread bilateral activation during speech and language  
716 tasks[52-54]. Indeed, a recent fMRI study showed RS connectivity patterns in lateral temporal  
717 cortex that were comparable between left and right hemispheres[6]. We found evidence for  
718 hemispheric differences in RS cortical functional organization based on analysis of all sampled  
719 brain regions, with inter-ROI distances being systematically greater in embedding space for the  
720 language-dominant hemisphere (Fig. 6b). This is consistent with greater inter-regional  
721 heterogeneity in that hemisphere compared to the non-dominant side. Importantly, the  
722 observed asymmetry could not be attributed specifically to ROIs involved in speech and  
723 language processing (Fig. 6b), nor was the difference in position in embedding space related to  
724 auditory responsiveness (Fig. 6a).

725 Recent studies that identified hemispheric differences in RS connectivity for the STS[22] and  
726 semantic networks more broadly[139] may reflect the general asymmetry observed here. This  
727 asymmetry may relate as well to the dichotomy between domain-specific (e.g., sensory  
728 processing) and domain-general (e.g., attention, working memory) cortical systems. In



729 particular, studies have emphasized that domain-general systems also exhibit hemispheric  
730 laterality[140, 141], suggesting that the asymmetry observed here may reflect this broader  
731 organization feature. This does not exclude the possibility of asymmetries specific to auditory  
732 regions emerging during sensory tasks, for example reflecting hemispheric biases in spectral  
733 and temporal processing[39, 42].

734

### 735 *Caveats & limitations*

736 A key concern regarding all human iEEG studies is that participants may not be representative  
737 of a healthy population. In the present study, results were consistent across participants  
738 despite differences in seizure disorder histories, medications, and seizure foci, and aligned with  
739 results obtained previously in healthy participants[25]. Another caveat is that our dataset,  
740 however extensive, did not sample the entire brain, and it was not possible to infer connectivity  
741 with unsampled regions. To address this, we applied DME analysis to fMRI data to establish that  
742 the organization of ROIs in embedding space was robust to the exclusion of unsampled ROIs.  
743 Although there was a greater effect of sparse, non-uniform sampling within an ROI, there was  
744 still considerable similarity in functional organization to embeddings derived from averages  
745 across the entire ROI

746 While subcortical structures (e.g., thalamus) that link sensory and higher order networks[142]  
747 were not sampled, the functional organization presented here was likely influenced indirectly  
748 by thalamo-cortical pathways[29, 143]. Previous fMRI studies of RS networks focused  
749 exclusively on cortical ROIs and did not consider the role of the thalamus and other subcortical  
750 structures. Despite this limitation, these studies have yielded valuable insights into the  
751 functional organization of the human cortical networks[1, 144].

752

### 753 *Concluding remarks and future directions*

754 This study extends the DME approach to characterize functional relationships between cortical  
755 regions investigated using iEEG recordings. These data help resolve several outstanding issues  
756 regarding the functional organization of human auditory cortical networks and stress the  
757 importance of a limbic pathway complementary to the dorsal and ventral streams. These  
758 results lay the foundation for future work investigating network organization during active  
759 speech and language processing. The superior time resolution of electrophysiological data  
760 allows for dynamic connectivity analysis on time scales relevant to this processing. An  
761 important next step for this work is to adapt this analysis to scalp EEG recordings, which offer  
762 considerable advantages over fMRI in terms of accessibility and cost. While the current work  
763 focused on auditory cortical networks, this approach can be readily generalized to advance our  
764 understanding of changes in brain organization during sleep and anesthesia, disorders of  
765 consciousness, as well as reorganization of cortical functional geometry secondary to lesions.

## 766 **Materials and Methods**

### 767 *Ethics Statement*

768 Research protocols aligned with best practices recently aggregated in [145] and were approved  
769 by the University of Iowa Institutional Review Board and the National Institutes of Health;  
770 written informed consent was obtained from all participants. Research participation did not  
771 interfere with acquisition of clinically necessary data, and participants could rescind consent for  
772 research without interrupting their clinical management.

773

### 774 *Participants*

775 The study was carried out in 49 neurosurgical patients (22 females) diagnosed with medically  
776 refractory epilepsy. The patients were undergoing chronic invasive electrophysiological  
777 monitoring to identify seizure foci prior to resection surgery (Supplementary Table 1). All  
778 participants except two were native English speakers. The participants were predominantly  
779 right-handed (42 out of 49); six participants were left-handed, and one had bilateral  
780 handedness. The majority of participants (35 out of 49) were left language-dominant, as  
781 determined by Wada test. Two participants were right hemisphere-dominant, and one had  
782 bilateral language dominance. The remaining 11 participants were not evaluated for language  
783 dominance; 9 of them were right-handed and thus were assumed left language-dominant for  
784 the purposes of the analysis of lateralization (see below). The participant with bilateral  
785 dominance, and the remaining two participants who did not undergo Wada test and who were  
786 left-handed were not included in the analysis of hemispheric asymmetry in Figure 6. All  
787 participants underwent audiological and neuropsychological assessment prior to electrode  
788 implantation, and none had auditory or cognitive deficits that would impact the results of this  
789 study. The participants were tapered off their antiepileptic drugs during chronic monitoring  
790 when RS data were collected.

791

### 792 *Experimental procedures*

793 *Pre-implantation neuroimaging.* All participants underwent whole-brain high-resolution T1-  
794 weighted structural MRI scans before electrode implantation. In a subset of ten participants (  
795 Supplementary Table 2), RS-fMRI data were used for estimates of functional connectivity. The  
796 scanner was a 3T GE Discovery MR750W with a 32-channel head coil. The pre-electrode  
797 implantation anatomical T1 scan (3D FSPGR BRAVO sequence) was obtained with the following  
798 parameters: FOV = 25.6 cm, flip angle = 12 deg., TR = 8.50 ms, TE = 3.29 ms, inversion time =  
799 450 ms, voxel size = 1.0 × 1.0 × 0.8 mm. For RS-fMRI, 5 blocks of 5-minute gradient-echo EPI  
800 runs (650 volumes) were collected with the following parameters: FOV = 22.0 cm, TR = 2260  
801 ms, TE = 30 ms, flip angle = 80 deg., voxel size = 3.45 × 3.45 × 4.0 mm. In some cases, fewer RS  
802 acquisition sequences were used in the final analysis due to movement artifact or because the

803 full scanning session was not completed. For each participant, RS-fMRI runs were acquired in  
804 the same session but non-contiguously (dispersed within an imaging session to avoid  
805 habituation). Participants were asked to keep their eyes open, and a fixation cross was  
806 presented through a projector.

807 *iEEG recordings.* iEEG recordings were obtained using either subdural and depth electrodes, or  
808 depth electrodes alone, based on clinical indications. Electrode arrays were manufactured by  
809 Ad-Tech Medical (Racine, WI). Subdural arrays, implanted in 36 participants out of 46, consisted  
810 of platinum-iridium discs (2.3 mm diameter, 5-10 mm inter-electrode distance), embedded in a  
811 silicon membrane. Stereotactically implanted depth arrays included between 4 and 12  
812 cylindrical contacts along the electrode shaft, with 5-10 mm inter-electrode distance. A  
813 subgaleal electrode, placed over the cranial vertex near midline, was used as a reference in all  
814 participants. All electrodes were placed solely on the basis of clinical requirements, as  
815 determined by the team of epileptologists and neurosurgeons[146].

816 No-task RS data were recorded in the dedicated, electrically shielded suite in The University of  
817 Iowa Clinical Research Unit while the participants lay in the hospital bed. RS data were collected  
818 6.4 +/- 3.5 days (mean ± standard deviation; range 1.5 – 20.9) after electrode implantation  
819 surgery. In the first 15 participants (L275 through L362), data were recorded using a TDT R22  
820 real-time processor (Tucker-Davis Technologies, Alachua, FL). In the remaining 34 participants  
821 (R369 through L585), data acquisition was performed using a Neuralynx Atlas System  
822 (Neuralynx Inc., Bozeman, MT). Recorded data were amplified, filtered (0.7–800 Hz bandpass, 5  
823 dB/octave rolloff for TDT-recorded data; 0.1–500 Hz bandpass, 12 dB/octave rolloff for  
824 Neuralynx-recorded data) and digitized at a sampling rate of 2034.5 Hz (TDT) or 2000 Hz  
825 (Neuralynx). In all but two participants, recording durations were between 10 and 18 minutes,  
826 the median was 10; in one participant duration was 6 min., and in one participant the duration  
827 was 81 min.

828

## 829 *Data analysis*

830 *Anatomical reconstruction and ROI parcellation.* Localization of recording sites and their  
831 assignment to ROIs relied on post-implantation T1-weighted anatomical MRI and post-  
832 implantation computed tomography (CT). All images were initially aligned with pre-operative T1  
833 scans using linear coregistration implemented in FSL (FLIRT)[147]. Electrodes were identified in  
834 the post-implantation MRI as magnetic susceptibility artifacts and in the CT as metallic  
835 hyperdensities. Electrode locations were further refined within the space of the pre-operative  
836 MRI using three-dimensional non-linear thin-plate spline warping[148], which corrected for  
837 post-operative brain shift and distortion. The warping was constrained with 50-100 control  
838 points, manually selected throughout the brain, which were visually aligned to landmarks in the  
839 pre- and post-implantation MRI.

840 Electrode locations were mapped into a common anatomical template space using a  
841 combination of surface-based and volumetric coregistration. Automated identification and  
842 parcellation of the cortical surface within T1-weighted images was carried out with FreeSurfer  
843 [149, 150]. Electrodes were assigned anatomical labels within the parcellation scheme of  
844 Destrieux et al. [151, 152], according to the label of the nearest vertex (within the T1 image  
845 space) of the cortical surface mesh generated by FreeSurfer. Labeling was visually inspected  
846 and corrected whenever the automated parcellation did not conform to expected gyral  
847 boundaries. Volumetric mapping of T1 images to the MNI-152 space relied on automated linear  
848 coregistration implemented in the `fsl_anat` pipeline of the FSL toolbox [153]. Electrode  
849 coordinates in MNI-152 space were obtained by applying the resulting transformation to the  
850 coordinates from the T1 image space.

851 To pool data across participants, the dimensionality of connectivity matrices was reduced by  
852 assigning electrodes to one of 58 ROIs organized into 6 ROI groups (see Fig. 1; Supplementary  
853 Table 2, 3) based upon anatomical reconstructions of electrode locations in each participant.  
854 For subdural arrays, ROI assignment was informed by automated parcellation of cortical  
855 gyri [151, 152] as implemented in the FreeSurfer software package. For depth arrays, it was  
856 informed by MRI sections along sagittal, coronal, and axial planes. For recording sites in  
857 Heschl's gyrus, delineation of the border between core auditory cortex and adjacent non-core  
858 areas (HGPM and HGAL, respectively) was performed in each participant using physiological  
859 criteria [154, 155]. Specifically, recording sites were assigned to HGPM if they exhibited phase-  
860 locked (frequency-following) responses to 100 Hz click trains and if the averaged evoked  
861 potentials to these stimuli featured short-latency (<20 ms) peaks. Such response features are  
862 characteristic for HGPM and are not present within HGAL [154]. Additionally, correlation  
863 coefficients between average evoked potential waveforms recorded from adjacent sites were  
864 examined to identify discontinuities in response profiles along Heschl's gyrus that could be  
865 interpreted as reflecting a transition from HGPM to HGAL. Superior temporal gyrus was  
866 subdivided into posterior and middle non-core auditory cortex ROIs (STGP and STGM), and  
867 auditory-related anterior ROI (STGA) using the transverse temporal sulcus and ascending ramus  
868 of the Sylvian fissure as macroanatomical boundaries. The insula was subdivided into posterior  
869 and anterior ROIs, with the former considered within the auditory-related ROI group [32].  
870 Middle and inferior temporal gyrus were each divided into posterior, middle, and anterior ROIs  
871 by dividing the gyrus into three approximately equal-length thirds. Angular gyrus was divided into  
872 posterior and anterior ROIs using the angular sulcus as a macroanatomical boundary. Anterior  
873 cingulate cortex was identified by automatic parcellation in FreeSurfer and was considered as  
874 part of the prefrontal ROI group, separately from the rest of the cingulate gyrus. Postcentral  
875 and precentral gyri were each divided into ventral and dorsal portions using the  $z_{\text{MNI}}$  coordinate  
876 (see below) of 40 mm as a boundary. Recording sites identified as seizure foci or characterized  
877 by excessive noise, or outside brain, were excluded from analyses and are not listed in  
878 Supplementary Table 2. Depth electrode contacts localized to the white matter were also  
879 excluded. Location within cortical white matter was determined based on visual inspection of

880 anatomical reconstruction data (MRI sections along sagittal, coronal, and axial planes) as done  
881 in our previous studies (e.g., [62]). Electrode coverage was largely restricted to a single  
882 hemisphere in individual participants, and contacts on the contralateral hemisphere were  
883 excluded from analysis (and are not listed in Supplementary Table 2) such that all connections  
884 represent intra-hemisphere functional connectivity.

885 *Preprocessing of fMRI data.* Standard preprocessing was applied to the RS-fMRI data acquired  
886 in the pre-implantation scan using FSL's FEAT pipeline, including spatial alignment and nuisance  
887 regression. White matter, cerebrospinal fluid and global ROIs were created using deep white  
888 matter, lateral ventricles and a whole brain mask, respectively. Regression was performed using  
889 the time series of these three nuisance ROIs as well as 6 motion parameters (3 rotations and 3  
890 translations) and their derivatives, detrended with second order polynomials. Temporal  
891 bandpass filtering was 0.008–0.08 Hz. Spatial smoothing was applied with a Gaussian kernel (6  
892 mm full-width at half maximum). The first two images from each run were discarded. Frame  
893 censoring was applied when the Euclidean norm of derivatives of motion parameters exceeded  
894 0.5 mm[156]. All runs were processed in native EPI space, then the residual data were  
895 transformed to MNI152 and concatenated.

896 *Preprocessing of iEEG data.* Analysis of iEEG data was performed using custom software written  
897 in MATLAB Version 2020a programming environment (MathWorks, Natick, MA, USA). After  
898 initial rejection of recording sites identified as seizure foci, several automated steps were taken  
899 to exclude recording channels and time intervals contaminated by noise. First, channels were  
900 excluded if average power in any frequency band [broadband, delta (1-4 Hz), theta (4-8 Hz),  
901 alpha (8-13Hz), beta (13-30 Hz), gamma (30-50 Hz), or high gamma (70-110 Hz); see below]  
902 exceeded 3.5 standard deviations of the average power across all channels for that participant.  
903 Next, transient artifacts were detected by identifying voltage deflections exceeding 10 standard  
904 deviations on a given channel. A time window was identified extending before and after the  
905 detected artifact until the voltage returned to the zero-mean baseline plus an additional 100 ms  
906 buffer before and after. High-frequency artifacts were also removed by masking segments of  
907 data with high gamma power exceeding 5 standard deviations of the mean across all segments.  
908 Only time bins free of these artifact masks were considered in subsequent analyses. Artifact  
909 rejection was applied across all channels simultaneously so that all connectivity measures were  
910 derived from the same time windows. Occasionally, particular channels survived the initial  
911 average power criteria yet had frequent artifacts that led to loss of data across all the other  
912 channels. There is a tradeoff in rejecting artifacts (losing time across all channels) and rejecting  
913 channels (losing all data for that channel). If artifacts occur on many channels, there is little  
914 benefit to excluding any one channel. However, if frequent artifacts occur on one or  
915 simultaneously on up to a few channels, omitting these can save more data from other  
916 channels than those channels contribute at all other times. We chose to optimize the total data  
917 retained, channels × time windows, and omitted some channels when necessary.

918 On occasion, noise from in-room clinical equipment and muscle artifacts appeared in the data  
919 as shared signals across channels. These types of noise are typically broadband, and can be  
920 detected via analysis of frequencies higher than those of interest here. To remove these signals,  
921 data from retained channels were high-pass filtered above 200 Hz, and a spatial filter was  
922 derived from the singular value decomposition omitting the first singular vector. This spatial  
923 filter was then applied to the broadband signal to remove this common signal.

924 *Connectivity analysis.* For RS-fMRI data, BOLD signals were averaged across voxel groupings and  
925 functional connectivity was calculated as Pearson correlation coefficients. Voxel groupings were  
926 either based on the Schaefer-Yeo 400 parcellation scheme[88] in MNI-152 space, or were based  
927 on iEEG electrode location in participant space (see Fig. 1). For the latter, fMRI voxels were  
928 chosen to represent comparable regions of the brain recorded by iEEG electrodes. For each  
929 electrode, the anatomical coordinates of the recording site were mapped to the closest valid  
930 MRI voxel,  $E$ , and a sphere of 25 voxels ( $25 \text{ mm}^3$ ) centered on  $E$  used as the corresponding  
931 recording site. This process was repeated for all  $N$  electrodes in the same ROI, and a single time  
932 series computed as the average of the fMRI BOLD signal in these  $N \times 25$  voxels. These averages  
933 were used to compute an ROI-by-ROI connectivity matrix for RS-fMRI data. For comparisons  
934 between iEEG and fMRI embeddings, voxels were processed in participant space and ROI labels  
935 from the parcellation scheme illustrated in Figure 1 and Supplementary Table 2 were applied to  
936 the fMRI data. For comparisons between fMRI embeddings derived from all cortical ROIs versus  
937 fMRI embeddings derived from just ROIs sampled in the iEEG experiments, electrode locations  
938 were transformed from participant space to MNI-152 space, then assigned to ROIs within the  
939 Schaefer-Yeo 400 scheme.

940 Connectivity was measured for iEEG data using orthogonalized band power envelope  
941 correlation[68]. This measure avoids artifacts due to volume conduction by discounting  
942 connectivity near zero phase lag. Data were divided into 60-second segments, pairwise  
943 connectivity estimated in each segment, and then connectivity estimates averaged across all  
944 segments for that subject. Power envelope correlations were calculated using a method similar  
945 to [68], except time-frequency decomposition was performed using the demodulated band  
946 transform[157] rather than wavelets. This measure avoids artifacts due to volume conduction  
947 by discounting connectivity near zero phase lag. For each frequency band (theta, alpha, beta,  
948 gamma; high gamma), the power at each time bin was calculated as the average (across  
949 frequencies) log of the squared amplitude. For each pair of signals  $X$  and  $Y$ , one was  
950 orthogonalized to the other by taking the magnitude of the imaginary component of the  
951 product of one signal with the normalized complex conjugate of the other:

$$Y_{orth} = |\text{Im}\{Y \times X^* / |X|\}|$$

952 Both signals were band-pass filtered (0.2 – 1 Hz), and the Pearson correlation calculated  
953 between signals. The process was repeated by orthogonalizing in the other direction and the  
954 overall envelope correlation for a pair of recording sites was the average of the two Pearson  
955 correlations. Lastly, correlations were averaged across segments.

956 Connectivity matrices were thresholded prior to diffusion map embedding to reduce the  
957 contribution of spurious connections to the analysis. We balanced our desire to minimize noisy  
958 connections while maintaining a connected graph (i.e., that there are no isolated nodes;  
959 required by DME[59]) by saving at least the top third (rounded up) connections for every row,  
960 as well as their corresponding columns (to preserve symmetry). To ensure that the graph was  
961 connected after thresholding, we also included any connections making up the minimum  
962 spanning tree of the graph represented by the elementwise reciprocal of the connectivity  
963 matrix to ensure the graph is connected.

964 *ROI-based connectivity analysis.* Connectivity between ROIs was computed as the average  
965 envelope correlation between all pairs of recording sites in the two ROIs. For analyses in which  
966 connectivity was summarized across participants (Fig. 3-8), we used only a subset of ROIs such  
967 that every possible pair of included ROIs was represented in at least two participants  
968 (Supplementary Table 2). This list of ROIs was obtained by iteratively removing ROIs with the  
969 worst cross-coverage with other ROIs until every ROI remaining had sufficient coverage with all  
970 remaining ROIs.

971 *Diffusion map embedding.* See the Appendix I for details about DME.

972 In brief, the functional connectivity is transformed by applying cosine similarity[25] to yield the  
973 similarity matrix  $\mathbf{K} = [k(i,j)]$ . This matrix then normalized by degree to yield a matrix  $\mathbf{P} = \mathbf{D}^{-1}\mathbf{K}$ ,  
974 where  $\mathbf{D}$  is the degree matrix, i.e. the diagonal elements of  $\mathbf{D} = \sum_{j=1}^N k(i,j)$ , where  $N$  is the  
975 number of recording sites, and the off-diagonal elements of  $\mathbf{D}$  are zero. If the recording sites  
976 are conceptualized as nodes on a graph with edges defined by  $\mathbf{K}$ , then  $\mathbf{P}$  can be understood as  
977 the transition probability matrix for a 'random walk' or a 'diffusion' on the graph (see Appendix  
978 I;[59, 60]). DME consists of mapping the recording sites into an embedding space using an  
979 eigendecomposition of  $\mathbf{P}$ ,

$$980 \Psi^{(t)}(x_i) = [\lambda_1^t \psi_1(x_i), \lambda_2^t \psi_2(x_i), \dots, \lambda_M^t \psi_M(x_i)]^T,$$

981 where  $\psi_j$  are the eigenvectors of  $\mathbf{P}$ .

982 The parameter  $t$  corresponds to the number of steps in the diffusion process (random walk on  
983 the graph). The coordinates of the data in embedding space are scaled according to  $\lambda_i^t$ , where  $\lambda_i$   
984 is the eigenvalue of the  $i^{\text{th}}$  dimension being scaled. Thus, the value of  $t$  sets the spatial scale of  
985 the analysis, with higher values de-emphasizing smaller eigenvalues. Because  $|\lambda_i| < 1 \forall i$ , at  
986 higher values of  $t$  each dimension will be scaled down ('collapse'), with the dimension  
987 corresponding to  $\max(|\lambda_i|)$  (i.e.,  $\lambda_1$ ) scaled the least. For  $t > 5$  in this dataset, the data collapses  
988 onto the single dimension of the largest eigenvalue. Because we wished to explore the  
989 structure of the data over multiple dimensions, we restricted our analyses to smaller values of  
990  $t$ . Here, we present data for  $t = 1$ .

991 DME can be implemented alternatively based on a symmetric version of diffusion matrix  $\mathbf{P}_{\text{symm}}$   
992  $= \mathbf{D}^{-0.5} \mathbf{K} \mathbf{D}^{-0.5}$ . Basing DME on  $\mathbf{P}_{\text{symm}}$  has the advantage that the eigenvectors of  $\mathbf{P}_{\text{symm}}$  form an

993 orthogonal basis set (unlike the eigenvectors of  $\mathbf{P}$ ), providing some additional convenience  
994 mathematically that is beyond the scope of this paper[60]. Additionally, the eigenvalues of  $\mathbf{P}$   
995 and  $\mathbf{P}_{\text{symm}}$  are identical.

996 In two sets of analyses presented here, pairs of embeddings were compared to each other: in  
997 the analysis of lateralization of speech and language networks, and in the comparison between  
998 iEEG and fMRI data. To do that, we used a change of basis operator to map embeddings into a  
999 common embedding space using the method described in Coifman et al 2014[60].

1000 *Dimensionality reduction via low rank approximations to  $\mathbf{P}_{\text{symm}}$ .* Diffusion map embedding offers  
1001 an opportunity to reduce the dimensionality of the underlying data by considering only those  
1002 dimensions that contribute importantly to the structure of the data, as manifested in the  
1003 structure of the transition probability matrix  $\mathbf{P}$ , or, equivalently, of the diffusion matrix  $\mathbf{P}_{\text{symm}}$ .  
1004 We used the eigenvalue spectrum of  $\mathbf{P}_{\text{symm}}$  to determine its ideal low rank approximation,  
1005 balancing dimensionality reduction and information loss. The basis for this is most easily  
1006 understood in terms of the eigenvalue spectrum of  $\mathbf{P}$ , whose spectrum is identical to that of  
1007  $\mathbf{P}_{\text{symm}}$ [60]. Because  $\mathbf{P}$  is real and symmetric, the magnitude of the eigenvalues is identical to the  
1008 singular values of  $\mathbf{P}$ . The singular values tell us about the fidelity of low rank approximations to  
1009  $\mathbf{P}$ . Specifically, if  $\mathbf{P}$  has a set of singular values  $\sigma_1 \geq \sigma_2 \geq \dots \geq \sigma_n$ , then for any integer  $k \geq 1$ ,

$$\min_{\widetilde{\mathbf{P}}_k} \|\mathbf{P} - \widetilde{\mathbf{P}}_k\|_2 = \sigma_{k+1},$$

1010 where  $\widetilde{\mathbf{P}}_k$  is the rank- $k$  approximation to  $\mathbf{P}$ . Thus, the magnitude of the eigenvalues corresponds  
1011 to the fidelity of the lower dimensional approximation, and the difference in the magnitude of  
1012 successive eigenvalues represents the improvement in that approximation as the  
1013 dimensionality increases. The spectrum of  $\mathbf{P}$  invariably has an inflection point (“elbow”),  
1014 separating two sets of eigenvalues  $\lambda_i$ : those whose magnitude decreases more quickly with  
1015 increasing  $i$ , and those beyond the inflection point whose magnitude decreases more slowly  
1016 with increasing  $i$ . The inflection point thus delineates the number of dimensions that are most  
1017 important for approximating  $\mathbf{P}$  or  $\mathbf{P}_{\text{symm}}$ . The inflection point  $k_{\text{infl}}$  was identified  
1018 algorithmically[158], and the number of dimensions retained set equal to  $k_{\text{infl}} - 1$ .

1019 *Comparing distances in embedding space.* The relative distance between points in embedding  
1020 space provides insight into the underlying functional geometry. In several analyses presented  
1021 here, two embeddings of identical sets of ROIs were compared as ROI distances within the two  
1022 embeddings. After mapping to a common space and reducing dimensionality as described  
1023 above, the two embeddings A and B were used to create the pairwise distance matrices  $\mathbf{A}'$  and  
1024  $\mathbf{B}'$ . The Pearson correlation coefficient  $r$  was then computed between the upper triangles  
1025 (excluding the diagonal) of the corresponding elements in the distance matrices. To compare  
1026 anatomical distance and distance in embedding space, inter-ROI anatomical distances were  
1027 calculated for each participant by computing the centroid of each ROI in MNI space, then  
1028 calculating Euclidean distances between centroids, followed by averaging distances across  
1029 participants.



1030 *Signal to noise (SNR) characteristics.* To measure the robustness of the embedding analysis to  
1031 variability over time, an SNR was computed as follows. For each participant, a channel  $\times$   
1032 channel  $\mathbf{P}_{\text{symm}}$  matrix was calculated for each 60 s segment of data. For each segment, DME  
1033 analysis was applied and a channel  $\times$  channel distance matrix calculated. These distance  
1034 matrices were averaged across segments. The ‘signal’ of interest was defined as the variability  
1035 (standard deviation) of this averaged distance matrix (ignoring the diagonals). The ‘noise’ was  
1036 defined as the variability across time, estimated for each element of the distance matrix as the  
1037 standard deviation across segments, then averaged across the elements of the matrix. The SNR  
1038 for functional connectivity itself was computed in an analogous manner, using the original  
1039 channel  $\times$  channel connectivity matrix rather than the matrix of embedding distances.

1040 *Estimating precision in position and distances in embedding space.* To obtain error estimates for  
1041 both ROI locations in embedding space and embedding distance between ROIs, average ROI  $\times$   
1042 ROI adjacency matrices were calculated. Our data are hierarchical/multilevel, in that we  
1043 sampled participants in whom there are multiple recording sites. Nonparametric bootstrap  
1044 sampling at the highest level (“cluster bootstrap”[159]; here the word “cluster” refers to the  
1045 hierarchical/multilevel structure of the data, with multiple recording sites within participants,  
1046 rather than algorithmic clustering) is the preferred approach for hierarchical data when groups  
1047 (here, participants) are sampled and observations (here, recording sites) occur within those  
1048 groups[160], with fewer necessary assumptions than multilevel (mixed-effects) modelling (e.g.,  
1049 subject effects are not assumed to be linear). Using this approach, participants were resampled  
1050 with replacement, connectivity averaged across the bootstrapped samples, and diffusion map  
1051 embedding performed for 100,000 such adjacency matrices. For locations in embedding space,  
1052 these embeddings were then mapped via the change of basis procedure described above to the  
1053 original group average embedding space. For each ROI, the mapped bootstrap iterations  
1054 produced a cloud of locations in embedding space that were summarized by the standard  
1055 deviation in each dimension. For embedding distances, no change of basis was necessary  
1056 because distances are preserved across bases.

1057 To compare the positions of STSL versus STSU relative to canonical auditory cortical ROIs  
1058 (HGPM, HGAL, PT, PP, STGP, and STGM) or ROIs involved in semantic processing (STGA, MTGA,  
1059 MTGP, ITGA, ITGP, TP, AGA, AGP, SMG, IFGop, IFGtr, IFGor[21, 76-78]), we calculated the  
1060 average pairwise distance from STSL or STSU to each such ROI. The difference between these  
1061 averages was compared to a null distribution obtained by Monte Carlo sampling of the  
1062 equivalent statistic obtained by randomly exchanging STSL/STSU labels by participant. The  
1063 specific comparisons performed were chosen *a priori* to constrain the number of possible  
1064 hypotheses to test; pairwise comparisons of all possible ROI pairs (let alone comparisons of all  
1065 higher-order groupings) would not have had sufficient statistical power under appropriate  
1066 corrections for multiple comparisons. Though different choices could have been made for  
1067 inclusion in the “semantic processing” category, exchanging one or two of these ROIs would not  
1068 strongly influence the average distance in a group of twelve ROIs.

1069 *Hierarchical clustering.* Agglomerative hierarchical clustering was done using the *linkage*  
1070 function in MATLAB, with Euclidean distance as the distance metric and Ward's linkage  
1071 (minimum variance algorithm) as the linkage method. The ordering of ROIs along the horizontal  
1072 axis in the dendrogram was determined using the *optimalleaforder* function in MATLAB, with  
1073 the optimization criterion set to 'group'.

1074 Non-parametric bootstrapping at the participant level, as described above, was used to  
1075 evaluate the robustness of clustering results both overall and at the level of individual clusters.  
1076 We compared the original cluster results obtained with the full dataset to the result obtained  
1077 with each bootstrap sample, then summarized those results across iterations.

1078 Overall stability of the cluster results was evaluated using the median normalized Fowlkes-  
1079 Mallows index[83] across cluster bootstrap iterations, noted as  $B_k$  for  $k$  clusters (see Appendix  
1080 II). Normalizing to the expected value  $E(B_k)$  (see Appendix II) results in an index where 0  
1081 represents average random (chance) clustering and 1 represents perfectly identical clustering.

1082 Cluster-wise stability was calculated by the membership of each cluster at each iteration to the  
1083 corresponding cluster obtained with the full dataset using the maximum Jaccard coefficient for  
1084 each reference cluster[84]. The Jaccard coefficient varies from 0 (no overlap in cluster  
1085 membership) to 1 (identical membership) and is defined as the ratio of the size of the set  
1086 containing intersection of the two clusters divided by the size of the set containing their union.  
1087 We then subtracted from this coefficient a bias estimate calculated by randomly permuting the  
1088 cluster assignments on each bootstrap iteration.

1089 *Auditory responsiveness.* In a subset of 37 participants, auditory responsiveness was evaluated  
1090 as percentage of sites within each ROI that exhibited high gamma responses to monosyllabic  
1091 word stimuli. The stimuli were monosyllabic words ("cat", "dog", "five", "ten", "red", "white"),  
1092 obtained from TIMIT (<https://doi.org/10.35111/17gk-bn40>) and LibriVox (<http://librivox.org/>)  
1093 databases. The words were presented in semantic categorization (animals and numbers target  
1094 categories) and tone target detection tasks as described previously [23, 85-87]. A total of 20  
1095 unique exemplars of each word were presented in each task: 14 spoken by different male and 6  
1096 by different female speakers. The stimuli were delivered via insert earphones (ER4B, Etymotic  
1097 Research, Elk Grove Village, IL) integrated into custom-fit earmolds. All stimuli had a duration of  
1098 300 ms, were root-mean-square amplitude-normalized and were delivered in random order.  
1099 The inter-stimulus interval was chosen randomly within a Gaussian distribution (mean 2 s; SD =  
1100 10 ms). The task was to push a response button whenever the participant heard a target sound.  
1101 The hand ipsilateral to the hemisphere in which the majority of electrodes were implanted was  
1102 used to make the behavioral response. There was no visual component to the task, and the  
1103 participants did not receive any specific instructions other than to respond to target auditory  
1104 stimuli by pressing a button. Mean high gamma (70-110 Hz) power within early (50 to 350 ms)  
1105 and late (350 to 650 ms) poststimulus time windows was compared with that in a prestimulus  
1106 window (-200 to -100 ms). Significance of high gamma responses was established at a  $\alpha = 0.05$   
1107 level using one-tailed Mann-Whitney  $U$  tests with false discovery rate correction.

1108 *Comparing language dominant/non-dominant hemispheres.* To test for differences in functional  
1109 geometry between language dominant and non-dominant hemispheres, two measures were  
1110 considered: differences in the location of individual ROIs in embedding space, and different  
1111 pairwise distances between ROIs in embedding space. To calculate differences in location of  
1112 individual ROIs, dominant/non-dominant average embeddings were mapped to a common  
1113 space (from an embedding using the average across all participants regardless of language  
1114 dominance) using the change of basis operator. The language-dominant location difference for  
1115 a specific ROI was calculated as the Euclidean distance between the two locations of each ROI  
1116 in this common space. To examine whether there was a consistent relationship between  
1117 hemispheric asymmetry in a given ROI's location in embedding space and the percentage of  
1118 either early or late auditory responsive sites within that ROI, two-tailed Spearman's rank tests  
1119 were used. To calculate differences in pairwise distances between ROIs, Euclidean distances  
1120 were calculated in embedding space for each hemisphere and then subtracted to obtain a  
1121 difference matrix. To determine whether the differences in location or pairwise distances were  
1122 larger than expected by chance, random permutations of the dominant/non-dominant labels  
1123 were used to generate empirical null distributions. Since this approach produces a  $p$ -value for  
1124 every pair of connections,  $p$ -values were adjusted using FDR to account for multiple  
1125 comparisons.

1126 *Analyses of fMRI connectivity in embedding space.* Two sets of analyses were performed using  
1127 fMRI data. First, iEEG and fMRI data were compared in embedding space. In this analysis,  
1128 connectivity based on RS-fMRI data from voxels located at electrode recording sites was  
1129 compare with the corresponding connectivity matrix derived from iEEG data. The embedding  
1130 analysis was applied to the two connectivity matrices, all pairwise inter-ROI distances  
1131 computed, and iEEG and fMRI data compared using the correlation of the pairwise ROI  
1132 distances. The second analysis was to compare embeddings derived from all ROIs in the RS-  
1133 fMRI scans to those derived from just ROIs sampled with iEEG electrodes. Here, ROI  $\times$  ROI  
1134 connectivity matrices were computed for all ROIs, then embeddings created from the full  
1135 matrices or from matrices containing just rows and columns corresponding to the ROIs sampled  
1136 with iEEG.

1137 **Data and code availability**

1138 Software and data used to generate figures are freely available at  
1139 <https://zenodo.org/record/7846505> or DOI 10.5281/zenodo.7846505. Complete data set is  
1140 available via a request to the Authors pending establishment of a formal data sharing  
1141 agreement and submission of a formal project outline. Please contact Bryan Krause  
1142 ([bmkrause@wisc.edu](mailto:bmkrause@wisc.edu)) for details.

## 1143 **Appendix I: Diffusion Map Embedding**

1144 In the framework of DME, we consider a space  $X$  that is the set of  $N$  recording sites. We  
1145 compute the similarity between those sites based on the time varying signals recorded at each  
1146 site, defining similarity  $k(x_i, x_j)$  as the cosine similarity between functional connectivity of nodes  
1147  $x_i$  and  $x_j$ .

1148 Define the matrix  $\mathbf{K}$  whose  $i, j^{\text{th}}$  element is  $k(x_i, x_j)$ .  $k(x_i, x_j)$  is required to be symmetric, i.e.,  $k(x_i, x_j)$   
1149  $= k(x_j, x_i)$ , and positivity preserving, i.e.  $k(x_i, x_j) > 0$  for all  $[i, j]$ , to allow for spectral analysis of a  
1150 normalized version of  $\mathbf{K}$ .

1151 From  $X$  and  $\mathbf{K}$  we can construct a weighted graph  $\Gamma$  in which the vertices are the nodes and the  
1152 edge weights are  $k(x_i, x_j)$ . We take random walks on the graph at time steps  $t = 1, 2, \dots$ , jumping  
1153 from node  $x_i$  to node  $x_j$  at each time step, with the (stochastic) decision as to which node should  
1154 be visited next depending on  $k(x_i, x_j)$ .

1155 Define

$$1156 \quad p(x_i, x_j) = k(x_i, x_j) / d(x_i),$$

1157 where

$$1158 \quad d(x_i) = \sum_j [k(x_i, x_j)]$$

1159 is the degree of node  $x_i$ . Normalizing  $k(x_i, x_j)$  in this way allows us to interpret it as the  
1160 probability  $p(x_i, x_j)$  that we'll jump from vertex  $x_i$  to vertex  $x_j$  in a single time step of our random  
1161 walk.

1162 If we consider a single time step, we only capture the structure in  $X$  on a very local scale, since  
1163 we can only jump between vertices that are directly connected. As we run the random walk  
1164 forward in time, we begin to explore more of our neighborhood, and we begin to explore other  
1165 neighborhoods as well. Two vertices  $x_i$  and  $x_j$  that have similar connectivity to the rest of the  
1166 network have a high probability of being connected during these longer walks because they  
1167 themselves are connected to similar groups of vertices, and so there are many possible paths  
1168 between  $x_i$  and  $x_j$ .

1169 The diffusion operator (matrix)  $\mathbf{P} = [p(x_i, x_j)]$  describes how signals diffuse from node to node in  
1170 the graph. If  $\mathbf{v}$  is a  $N \times 1$  vector (i.e., a value assigned to each vertex, for example representing an  
1171 input to each node), then  $\mathbf{P}$  describes what will happen to that input as time goes on.

$$1172 \quad \mathbf{P}\mathbf{v} = [p(x_1, x_1)\mathbf{v}[x_1] + p(x_1, x_2)\mathbf{v}[x_2] + \dots; p(x_2, x_1)\mathbf{v}[x_1] + p(x_2, x_2)\mathbf{v}[x_2] + \dots; \dots]^T$$

1173 If, for example, all the nodes were insular, with  $p(x_i, x_i) = 1$  for all  $i$ , and otherwise  $p(x_i, x_j) = 0$ ,  $\mathbf{P}\mathbf{v} =$   
1174  $\mathbf{v}$ , i.e., no diffusion occurs. If the probabilities are more distributed,  $\mathbf{P}\mathbf{v}$  would reveal how much  
1175 signals diffuse out from each node given the starting condition of  $\mathbf{v}$ . Importantly,  $\mathbf{P}^k\mathbf{v}$  would  
1176 reveal what that distribution looks like after  $k$  time steps.

1177 The eigenvector expansion of  $\mathbf{P}$  based on its eigenvectors  $\psi_j$  and eigenvalues  $\lambda_j, j = 1 \dots N$ , is a  
1178 natural method for uncovering structure in  $\mathbf{P}$  because each eigenvector of  $\mathbf{P}$  is a dimension  
1179 along which relevant organizational features emerge. That is, clusters of related points  
1180 (communities) tend to be distinct and ordered along these dimensions. In fact, we could  
1181 preserve a lot of information about  $\mathbf{P}$  by keeping just a subset of  $M$  of these vectors and  
1182 discarding the rest. The information we want to preserve in the context of diffusion map  
1183 embedding is the functional distance between the data at two nodes given  $t$  time steps to  
1184 meander through the graph. We can define the diffusion map

$$1185 \quad \Psi^{(t)}(x_i) = [\lambda_1^{-t} \psi_1(x_i), \lambda_1^{-t} \psi_1(x_i), \dots, \lambda_M^{-t} \psi_M(x_i)]^T,$$

1186 which maps each point  $x$  in  $X$  to a point in an embedding space of dimension  $M \leq N$ . In this  
1187 space, the diffusion distance  $D$ , which is the Euclidean distance between points, is the  
1188 difference in the probability distributions linking  $x_i$  to the rest of the network and  $x_j$  to the rest  
1189 of the network:

$$1190 \quad D^{(t)}(x_i, x_j)^2 = \|\Psi^{(t)}(x_i) - \Psi^{(t)}(x_j)\|_{l_2}^2 = \|\rho^{(t)}(x_i, :) - \rho^{(t)}(x_j, :)\|_{l_2}^2.$$

1191 To compare embeddings across groups of participants, or modalities of measurements, it is  
1192 necessary to map embeddings to a common space. To do so, consider two sets of data  $\alpha$  and  $\beta$ ,  
1193 and the data spaces  $X_\alpha$  and  $X_\beta$ . The problem is that  $X_\alpha$  and  $X_\beta$  are different spaces with different  
1194 kernels  $k_\alpha$  and  $k_\beta$ . This means that the eigenvectors for  $\mathbf{P}_\alpha$  and  $\mathbf{P}_\beta$  will be different, and data  
1195 projected into a space defined by some subset of the eigenvectors cannot be compared  
1196 directly. The solution is to apply a change of basis operator to one set of the eigenvectors to get  
1197 the data into the same embedding space [60]:

$$1198 \quad D^{(t)}(x_i|_\alpha, x_j|_\beta) = \|\Psi^{(t)}_\alpha(x) - O_{\beta \rightarrow \alpha} \Psi^{(t)}_\beta(x)\|_{l_2}.$$

1199 Where the change of basis operator  $O_{\beta \rightarrow \alpha}$  is defined as

$$1200 \quad O_{\beta \rightarrow \alpha} \mathbf{v} = \sum_j [\mathbf{v}(j) \langle \psi^{(i)}_\alpha, \psi^{(j)}_\beta \rangle]_{i \geq 1},$$

1201 Where  $\langle \psi^{(i)}_\alpha, \psi^{(j)}_\beta \rangle$  is the inner product of  $\psi^{(i)}_\alpha$  and  $\psi^{(j)}_\beta$ .

1202 **Appendix II: Fowlkes-Mallows Index**

1203 The content of this appendix uses the functions and notation of Fowlkes and Mallows, 1983  
1204 {Fowlkes, 1983 #9946} with minor adjustments. Their index, denoted  $B_k$ , where  $k$  is the number  
1205 of clusters, represents the similarity of clusterings, independent of cluster ordering, as a value  
1206 between 0 and 1, where 1 represents identical clustering.  $B_k$  is given from the following  
1207 equations:

1208

$$B_k = T_k / \sqrt{P_k Q_k}$$

1209 where

$$T_k = \sum_{i=1}^k \sum_{j=1}^k m_{ij}^2 - n$$
$$P_k = \sum_{i=1}^k \left( \sum_{j=1}^k m_{ij}^2 \right)^2 - n$$
$$Q_k = \sum_{j=1}^k \left( \sum_{i=1}^k m_{ij}^2 \right)^2 - n$$

1210 ...and  $M = [m_{ij}]$  is a matrix with  $k$  rows and  $k$  columns where each  $m_{ij}$  represents the number of objects in  
1211 cluster  $i$  from one clustering and cluster  $j$  from the other clustering.  $n$  is the total number of objects  
1212 clustered. In the case of random assignment to clusters of the sizes observed, however,  $B_k$  is biased (not  
1213 zero), and the expected value for this bias is given by:

$$E(B_k) = \frac{\sqrt{P_k Q_k}}{n(n-1)}$$

1214 We normalized by this bias value to give a stability index that averages 0 for chance assignment to  
1215 clusters (with this normalization, values less than 0 are theoretically possible) and 1 for perfect  
1216 concordance:

$$stability = \frac{B_k - E(B_k)}{1 - E(B_k)}$$

1217

1218

REFERENCES CITED

- 1219  
1220
- 1221 1. Biswal BB, Mennes M, Zuo XN, Gohel S, Kelly C, Smith SM, et al. Toward discovery science of  
1222 human brain function. *Proc Natl Acad Sci U S A*. 2010;107(10):4734-9. Epub 2010/02/24. doi:  
1223 10.1073/pnas.0911855107. PubMed PMID: 20176931; PubMed Central PMCID:  
1224 PMCPMC2842060.
- 1225 2. Yeo BT, Krienen FM, Sepulcre J, Sabuncu MR, Lashkari D, Hollinshead M, et al. The organization  
1226 of the human cerebral cortex estimated by intrinsic functional connectivity. *J Neurophysiol*.  
1227 2011;106(3):1125-65. Epub 2011/06/10. doi: 10.1152/jn.00338.2011. PubMed PMID: 21653723;  
1228 PubMed Central PMCID: PMCPMC3174820.
- 1229 3. Smith SM, Fox PT, Miller KL, Glahn DC, Fox PM, Mackay CE, et al. Correspondence of the brain's  
1230 functional architecture during activation and rest. *Proc Natl Acad Sci U S A*. 2009;106(31):13040-  
1231 5. Epub 2009/07/22. doi: 10.1073/pnas.0905267106. PubMed PMID: 19620724; PubMed  
1232 Central PMCID: PMCPMC2722273.
- 1233 4. Scott SK. The neurobiology of speech perception and production--can functional imaging tell us  
1234 anything we did not already know? *J Commun Disord*. 2012;45(6):419-25. Epub 2012/07/31. doi:  
1235 10.1016/j.jcomdis.2012.06.007. PubMed PMID: 22840926.
- 1236 5. Woods DL, Alain C. Functional imaging of human auditory cortex. *Curr Opin Otolaryngol Head  
1237 Neck Surg*. 2009;17(5):407-11. Epub 2009/07/28. doi: 10.1097/MOO.0b013e3283303330.  
1238 PubMed PMID: 19633556.
- 1239 6. Jackson RL, Bajada CJ, Rice GE, Cloutman LL, Lambon Ralph MA. An emergent functional  
1240 parcellation of the temporal cortex. *Neuroimage*. 2018;170:385-99. Epub 2017/04/19. doi:  
1241 10.1016/j.neuroimage.2017.04.024. PubMed PMID: 28419851.
- 1242 7. Wang J, Tao A, Anderson WS, Madsen JR, Kreiman G. Mesoscopic physiological interactions in  
1243 the human brain reveal small-world properties. *Cell Rep*. 2021;36(8):109585. Epub 2021/08/26.  
1244 doi: 10.1016/j.celrep.2021.109585. PubMed PMID: 34433053; PubMed Central PMCID:  
1245 PMCPMC8457376.
- 1246 8. Ko AL, Weaver KE, Hakimian S, Ojemann JG. Identifying functional networks using endogenous  
1247 connectivity in gamma band electrocorticography. *Brain Connect*. 2013;3(5):491-502. Epub  
1248 2013/07/25. doi: 10.1089/brain.2013.0157. PubMed PMID: 23879617; PubMed Central PMCID:  
1249 PMCPMC3796331.
- 1250 9. Zhang Y, Ding Y, Huang J, Zhou W, Ling Z, Hong B, et al. Hierarchical cortical networks of "voice  
1251 patches" for processing voices in human brain. *Proc Natl Acad Sci U S A*. 2021;118(52). Epub  
1252 2021/12/22. doi: 10.1073/pnas.2113887118. PubMed PMID: 34930846; PubMed Central  
1253 PMCID: PMCPMC8719861.
- 1254 10. de Pasquale F, Della Penna S, Snyder AZ, Marzetti L, Pizzella V, Romani GL, et al. A cortical core  
1255 for dynamic integration of functional networks in the resting human brain. *Neuron*.  
1256 2012;74(4):753-64. Epub 2012/05/29. doi: 10.1016/j.neuron.2012.03.031. PubMed PMID:  
1257 22632732; PubMed Central PMCID: PMCPMC3361697.



- 1258 11. Vezoli J, Vinck M, Bosman CA, Bastos AM, Lewis CM, Kennedy H, et al. Brain rhythms define  
1259 distinct interaction networks with differential dependence on anatomy. *Neuron*.  
1260 2021;109(23):3862-78.e5. Epub 2021/10/22. doi: 10.1016/j.neuron.2021.09.052. PubMed PMID:  
1261 34672985; PubMed Central PMCID: PMCPMC8639786.
- 1262 12. Barzegaran E, Plomp G. Four concurrent feedforward and feedback networks with different  
1263 roles in the visual cortical hierarchy. *PLoS Biol*. 2022;20(2):e3001534. Epub 2022/02/11. doi:  
1264 10.1371/journal.pbio.3001534. PubMed PMID: 35143472; PubMed Central PMCID:  
1265 PMCPMC8865670.
- 1266 13. Richter CG, Thompson WH, Bosman CA, Fries P. Top-Down Beta Enhances Bottom-Up Gamma. *J*  
1267 *Neurosci*. 2017;37(28):6698-711. Epub 2017/06/09. doi: 10.1523/jneurosci.3771-16.2017.  
1268 PubMed PMID: 28592697; PubMed Central PMCID: PMCPMC5508256.
- 1269 14. Bastos AM, Vezoli J, Bosman CA, Schoffelen JM, Oostenveld R, Dowdall JR, et al. Visual areas  
1270 exert feedforward and feedback influences through distinct frequency channels. *Neuron*.  
1271 2015;85(2):390-401. doi: 10.1016/j.neuron.2014.12.018. PubMed PMID: 25556836.
- 1272 15. Michalareas G, Vezoli J, van Pelt S, Schoffelen JM, Kennedy H, Fries P. Alpha-Beta and Gamma  
1273 Rhythms Subserve Feedback and Feedforward Influences among Human Visual Cortical Areas.  
1274 *Neuron*. 2016;89(2):384-97. Epub 2016/01/19. doi: 10.1016/j.neuron.2015.12.018. PubMed  
1275 PMID: 26777277; PubMed Central PMCID: PMCPMC4871751.
- 1276 16. Fontolan L, Morillon B, Liégeois-Chauvel C, Giraud AL. The contribution of frequency-specific  
1277 activity to hierarchical information processing in the human auditory cortex. *Nat Commun*.  
1278 2014;5:4694. doi: 10.1038/ncomms5694. PubMed PMID: 25178489; PubMed Central PMCID:  
1279 PMCPMC4164774.
- 1280 17. Baroni F, Morillon B, Trébuchon A, Liégeois-Chauvel C, Olasagasti I, Giraud AL. Converging  
1281 intracortical signatures of two separated processing timescales in human early auditory cortex.  
1282 *Neuroimage*. 2020;218:116882. Epub 2020/05/23. doi: 10.1016/j.neuroimage.2020.116882.  
1283 PubMed PMID: 32439539.
- 1284 18. Chalas N, Omigie D, Poeppel D, van Wassenhove V. Hierarchically nested networks optimize the  
1285 analysis of audiovisual speech. *iScience*. 2023;26(3):106257. Epub 2023/03/14. doi:  
1286 10.1016/j.isci.2023.106257. PubMed PMID: 36909667; PubMed Central PMCID:  
1287 PMCPMC9993032.
- 1288 19. Hayat H, Marmelshtein A, Krom AJ, Sela Y, Tankus A, Strauss I, et al. Reduced neural feedback  
1289 signaling despite robust neuron and gamma auditory responses during human sleep. *Nat*  
1290 *Neurosci*. 2022;25(7):935-43. Epub 2022/07/12. doi: 10.1038/s41593-022-01107-4. PubMed  
1291 PMID: 35817847; PubMed Central PMCID: PMCPMC9276533.
- 1292 20. Visser M, Jefferies E, Lambon Ralph MA. Semantic processing in the anterior temporal lobes: a  
1293 meta-analysis of the functional neuroimaging literature. *J Cogn Neurosci*. 2010;22(6):1083-94.  
1294 Epub 2009/07/09. doi: 10.1162/jocn.2009.21309. PubMed PMID: 19583477.

- 1295 21. Ralph MA, Jefferies E, Patterson K, Rogers TT. The neural and computational bases of semantic  
1296 cognition. *Nat Rev Neurosci*. 2017;18(1):42-55. Epub 2016/11/25. doi: 10.1038/nrn.2016.150.  
1297 PubMed PMID: 27881854.
- 1298 22. Abrams DA, Kochalka J, Bhide S, Ryali S, Menon V. Intrinsic functional architecture of the human  
1299 speech processing network. *Cortex*. 2020;129:41-56. Epub 2020/05/20. doi:  
1300 10.1016/j.cortex.2020.03.013. PubMed PMID: 32428761.
- 1301 23. Nourski KV, Steinschneider M, Rhone AE, Kovach CK, Banks MI, Krause BM, et al.  
1302 Electrophysiology of the Human Superior Temporal Sulcus during Speech Processing. *Cereb*  
1303 *Cortex*. 2021;31(2):1131-48. Epub 2020/10/17. doi: 10.1093/cercor/bhaa281. PubMed PMID:  
1304 33063098; PubMed Central PMCID: PMCPCMC7786351.
- 1305 24. Langs G, Golland P, Tie Y, Rigolo L, Golby AJ. Functional Geometry Alignment and Localization of  
1306 Brain Areas. *Adv Neural Inf Process Syst*. 2010;1:1225-33. Epub 2010/01/01. PubMed PMID:  
1307 24808719; PubMed Central PMCID: PMCPCMC4010233.
- 1308 25. Margulies DS, Ghosh SS, Goulas A, Falkiewicz M, Huntenburg JM, Langs G, et al. Situating the  
1309 default-mode network along a principal gradient of macroscale cortical organization. *Proc Natl*  
1310 *Acad Sci U S A*. 2016;113(44):12574-9. Epub 2016/11/03. doi: 10.1073/pnas.1608282113.  
1311 PubMed PMID: 27791099; PubMed Central PMCID: PMCPCMC5098630.
- 1312 26. Huang Z, Mashour GA, Hudetz AG. Functional geometry of the cortex encodes dimensions of  
1313 consciousness. *Nat Commun*. 2023;14(1):72. Epub 2023/01/06. doi: 10.1038/s41467-022-35764-  
1314 7. PubMed PMID: 36604428; PubMed Central PMCID: PMCPCMC9814511.
- 1315 27. Wilson SM, Bautista A, McCarron A. Convergence of spoken and written language processing in  
1316 the superior temporal sulcus. *Neuroimage*. 2018;171:62-74. Epub 2017/12/27. doi:  
1317 10.1016/j.neuroimage.2017.12.068. PubMed PMID: 29277646; PubMed Central PMCID:  
1318 PMCPCMC5857434.
- 1319 28. Forseth KJ, Hickok G, Rollo PS, Tandon N. Language prediction mechanisms in human auditory  
1320 cortex. *Nat Commun*. 2020;11(1):5240. Epub 2020/10/18. doi: 10.1038/s41467-020-19010-6.  
1321 PubMed PMID: 33067457; PubMed Central PMCID: PMCPCMC7567874.
- 1322 29. Hamilton LS, Oganian Y, Hall J, Chang EF. Parallel and distributed encoding of speech across  
1323 human auditory cortex. *Cell*. 2021;184(18):4626-39 e13. Epub 2021/08/20. doi:  
1324 10.1016/j.cell.2021.07.019. PubMed PMID: 34411517; PubMed Central PMCID:  
1325 PMCPCMC8456481.
- 1326 30. Friederici AD, Meyer M, von Cramon DY. Auditory language comprehension: an event-related  
1327 fMRI study on the processing of syntactic and lexical information. *Brain Lang*. 2000;75(3):289-  
1328 300. Epub 2001/06/02. PubMed PMID: 11386224.
- 1329 31. Angulo-Perkins A, Aube W, Peretz I, Barrios FA, Armony JL, Concha L. Music listening engages  
1330 specific cortical regions within the temporal lobes: differences between musicians and non-  
1331 musicians. *Cortex*. 2014;59:126-37. Epub 2014/09/01. doi: 10.1016/j.cortex.2014.07.013.  
1332 PubMed PMID: 25173956.

- 1333 32. Zhang Y, Zhou W, Wang S, Zhou Q, Wang H, Zhang B, et al. The Roles of Subdivisions of Human  
1334 Insula in Emotion Perception and Auditory Processing. *Cereb Cortex*. 2019;29(2):517-28. Epub  
1335 2018/01/18. doi: 10.1093/cercor/bhx334. PubMed PMID: 29342237.
- 1336 33. Price CJ. A review and synthesis of the first 20 years of PET and fMRI studies of heard speech,  
1337 spoken language and reading. *Neuroimage*. 2012;62(2):816-47. Epub 2012/05/16. doi:  
1338 10.1016/j.neuroimage.2012.04.062. PubMed PMID: 22584224; PubMed Central PMCID:  
1339 PMCPMC3398395.
- 1340 34. Hickok G. The functional neuroanatomy of language. *Phys Life Rev*. 2009;6(3):121-43. Epub  
1341 2010/02/18. doi: 10.1016/j.plrev.2009.06.001. PubMed PMID: 20161054; PubMed Central  
1342 PMCID: PMCPMC2747108.
- 1343 35. Beauchamp MS. The social mysteries of the superior temporal sulcus. *Trends Cogn Sci*.  
1344 2015;19(9):489-90. Epub 2015/07/26. doi: 10.1016/j.tics.2015.07.002. PubMed PMID:  
1345 26208834; PubMed Central PMCID: PMCPMC4556565.
- 1346 36. Chang EF, Raygor KP, Berger MS. Contemporary model of language organization: an overview  
1347 for neurosurgeons. *J Neurosurg*. 2015;122(2):250-61. Epub 2014/11/26. doi:  
1348 10.3171/2014.10.JNS132647. PubMed PMID: 25423277.
- 1349 37. Venezia JH, Vaden KI, Jr., Rong F, Maddox D, Saberi K, Hickok G. Auditory, Visual and Audiovisual  
1350 Speech Processing Streams in Superior Temporal Sulcus. *Front Hum Neurosci*. 2017;11:174.  
1351 Epub 2017/04/26. doi: 10.3389/fnhum.2017.00174. PubMed PMID: 28439236; PubMed Central  
1352 PMCID: PMCPMC5383672.
- 1353 38. Rauschecker JP, Scott SK. Maps and streams in the auditory cortex: nonhuman primates  
1354 illuminate human speech processing. *Nat Neurosci*. 2009;12(6):718-24. doi: 10.1038/nn.2331.  
1355 PubMed PMID: 19471271; PubMed Central PMCID: PMCPMC2846110.
- 1356 39. Hickok G, Poeppel D. The cortical organization of speech processing. *Nat Rev Neurosci*.  
1357 2007;8(5):393-402. Epub 2007/04/14. doi: 10.1038/nrn2113. PubMed PMID: 17431404.
- 1358 40. Friederici AD. The cortical language circuit: from auditory perception to sentence  
1359 comprehension. *Trends Cogn Sci*. 2012;16(5):262-8. Epub 2012/04/21. doi:  
1360 10.1016/j.tics.2012.04.001. PubMed PMID: 22516238.
- 1361 41. Cloutman LL. Interaction between dorsal and ventral processing streams: where, when and  
1362 how? *Brain Lang*. 2013;127(2):251-63. Epub 2012/09/13. doi: 10.1016/j.bandl.2012.08.003.  
1363 PubMed PMID: 22968092.
- 1364 42. Hickok G, Poeppel D. Neural basis of speech perception. *Handb Clin Neurol*. 2015;129:149-60.  
1365 Epub 2015/03/03. doi: 10.1016/B978-0-444-62630-1.00008-1. PubMed PMID: 25726267.
- 1366 43. Rauschecker JP. Where, When, and How: Are they all sensorimotor? Towards a unified view of  
1367 the dorsal pathway in vision and audition. *Cortex*. 2018;98:262-8. Epub 2017/12/01. doi:  
1368 10.1016/j.cortex.2017.10.020. PubMed PMID: 29183630; PubMed Central PMCID:  
1369 PMCPMC5771843.

- 1370 44. Saur D, Kreher BW, Schnell S, Kummerer D, Kellmeyer P, Vry MS, et al. Ventral and dorsal  
1371 pathways for language. *Proc Natl Acad Sci U S A*. 2008;105(46):18035-40. Epub 2008/11/14. doi:  
1372 10.1073/pnas.0805234105. PubMed PMID: 19004769; PubMed Central PMCID:  
1373 PMCPMC2584675.
- 1374 45. Munoz-Lopez MM, Mohedano-Moriano A, Insausti R. Anatomical pathways for auditory memory  
1375 in primates. *Front Neuroanat*. 2010;4:129. Epub 2010/10/27. doi: 10.3389/fnana.2010.00129.  
1376 PubMed PMID: 20976037; PubMed Central PMCID: PMCPMC2957958.
- 1377 46. Kraus KS, Canlon B. Neuronal connectivity and interactions between the auditory and limbic  
1378 systems. Effects of noise and tinnitus. *Hear Res*. 2012;288(1-2):34-46. Epub 2012/03/24. doi:  
1379 10.1016/j.heares.2012.02.009. PubMed PMID: 22440225.
- 1380 47. Husain FT, Schmidt SA. Using resting state functional connectivity to unravel networks of  
1381 tinnitus. *Hear Res*. 2014;307:153-62. Epub 2013/07/31. doi: 10.1016/j.heares.2013.07.010.  
1382 PubMed PMID: 23895873.
- 1383 48. Kumar S, Joseph S, Gander PE, Barascud N, Halpern AR, Griffiths TD. A Brain System for Auditory  
1384 Working Memory. *J Neurosci*. 2016;36(16):4492-505. Epub 2016/04/22. doi:  
1385 10.1523/jneurosci.4341-14.2016. PubMed PMID: 27098693; PubMed Central PMCID:  
1386 PMCPMC4837683.
- 1387 49. Kumar S, Gander PE, Berger JI, Billig AJ, Nourski KV, Oya H, et al. Oscillatory correlates of  
1388 auditory working memory examined with human electrocorticography. *Neuropsychologia*.  
1389 2021;150:107691. Epub 2020/11/24. doi: 10.1016/j.neuropsychologia.2020.107691. PubMed  
1390 PMID: 33227284; PubMed Central PMCID: PMCPMC7884909.
- 1391 50. Geschwind N. The organization of language and the brain. *Science*. 1970;170(3961):940-4. Epub  
1392 1970/11/27. doi: 10.1126/science.170.3961.940. PubMed PMID: 5475022.
- 1393 51. Hagoort P. The neurobiology of language beyond single-word processing. *Science*.  
1394 2019;366(6461):55-8. Epub 2019/10/12. doi: 10.1126/science.aax0289. PubMed PMID:  
1395 31604301.
- 1396 52. de Heer WA, Huth AG, Griffiths TL, Gallant JL, Theunissen FE. The Hierarchical Cortical  
1397 Organization of Human Speech Processing. *J Neurosci*. 2017;37(27):6539-57. Epub 2017/06/08.  
1398 doi: 10.1523/jneurosci.3267-16.2017. PubMed PMID: 28588065; PubMed Central PMCID:  
1399 PMCPMC5511884.
- 1400 53. Binder JR, Frost JA, Hammeke TA, Bellgowan PS, Springer JA, Kaufman JN, et al. Human temporal  
1401 lobe activation by speech and nonspeech sounds. *Cereb Cortex*. 2000;10(5):512-28. Epub  
1402 2000/06/10. doi: 10.1093/cercor/10.5.512. PubMed PMID: 10847601.
- 1403 54. Cogan GB, Thesen T, Carlson C, Doyle W, Devinsky O, Pesaran B. Sensory-motor transformations  
1404 for speech occur bilaterally. *Nature*. 2014;507(7490):94-8. Epub 2014/01/17. doi:  
1405 10.1038/nature12935. PubMed PMID: 24429520; PubMed Central PMCID: PMCPMC4000028.
- 1406 55. McGettigan C, Scott SK. Cortical asymmetries in speech perception: what's wrong, what's right  
1407 and what's left? *Trends Cogn Sci*. 2012;16(5):269-76. Epub 2012/04/24. doi:

- 1408 10.1016/j.tics.2012.04.006. PubMed PMID: 22521208; PubMed Central PMCID:  
1409 PMCPMC4083255.
- 1410 56. Turkeltaub PE, Coslett HB. Localization of sublexical speech perception components. *Brain Lang.*  
1411 2010;114(1):1-15. Epub 2010/04/24. doi: 10.1016/j.bandl.2010.03.008. PubMed PMID:  
1412 20413149; PubMed Central PMCID: PMCPMC2914564.
- 1413 57. Leaver AM, Rauschecker JP. Cortical representation of natural complex sounds: effects of  
1414 acoustic features and auditory object category. *J Neurosci.* 2010;30(22):7604-12. Epub  
1415 2010/06/04. doi: 10.1523/jneurosci.0296-10.2010. PubMed PMID: 20519535; PubMed Central  
1416 PMCID: PMCPMC2930617.
- 1417 58. Eisner F, McGettigan C, Faulkner A, Rosen S, Scott SK. Inferior frontal gyrus activation predicts  
1418 individual differences in perceptual learning of cochlear-implant simulations. *J Neurosci.*  
1419 2010;30(21):7179-86. Epub 2010/05/28. doi: 10.1523/JNEUROSCI.4040-09.2010. PubMed PMID:  
1420 20505085; PubMed Central PMCID: PMCPMC2883443.
- 1421 59. Coifman RR, Lafon S, Lee AB, Maggioni M, Nadler B, Warner F, et al. Geometric diffusions as a  
1422 tool for harmonic analysis and structure definition of data: diffusion maps. *Proc Natl Acad Sci U*  
1423 *S A.* 2005;102(21):7426-31. Epub 2005/05/19. doi: 10.1073/pnas.0500334102. PubMed PMID:  
1424 15899970; PubMed Central PMCID: PMCPMC1140422.
- 1425 60. Coifman RR, Hirn MJ. Diffusion maps for changing data. *Applied and Computational Harmonic*  
1426 *Analysis.* 2014;36(1):79-107. doi: <https://doi.org/10.1016/j.acha.2013.03.001>.
- 1427 61. Lafon S, Lee AB. Diffusion maps and coarse-graining: A unified framework for dimensionality  
1428 reduction, graph partitioning, and data set parameterization. *IEEE Trans Pattern Anal Mach*  
1429 *Intell.* 2006;28(9):1393-403. Epub 2006/08/26. doi: 10.1109/TPAMI.2006.184. PubMed PMID:  
1430 16929727.
- 1431 62. Banks MI, Krause BM, Endemann CM, Campbell DI, Kovach CK, Dyken ME, et al. Cortical  
1432 functional connectivity indexes arousal state during sleep and anesthesia. *Neuroimage.*  
1433 2020;211:116627. Epub 2020/02/12. doi: 10.1016/j.neuroimage.2020.116627. PubMed PMID:  
1434 32045640; PubMed Central PMCID: PMCPMC7117963.
- 1435 63. Nourski KV, Steinschneider M, Rhone AE, Kawasaki H, Howard MA, 3rd, Banks MI. Auditory  
1436 Predictive Coding across Awareness States under Anesthesia: An Intracranial Electrophysiology  
1437 Study. *J Neurosci.* 2018;38(39):8441-52. Epub 2018/08/22. doi: 10.1523/JNEUROSCI.0967-  
1438 18.2018. PubMed PMID: 30126970; PubMed Central PMCID: PMCPMC6158689.
- 1439 64. Nourski KV, Steinschneider M, Rhone AE, Kawasaki H, Howard MA, 3rd, Banks MI. Processing of  
1440 auditory novelty across the cortical hierarchy: An intracranial electrophysiology study.  
1441 *Neuroimage.* 2018;183:412-24. Epub 2018/08/17. doi: 10.1016/j.neuroimage.2018.08.027.  
1442 PubMed PMID: 30114466; PubMed Central PMCID: PMCPMC6207077
- 1443 65. Nourski KV, Steinschneider M, Rhone AE, Krause BM, Kawasaki H, Banks MI. Cortical responses  
1444 to auditory novelty across task conditions: An intracranial electrophysiology study. *Hear Res.*  
1445 2021;399:107911. Epub 2020/02/23. doi: 10.1016/j.heares.2020.107911. PubMed PMID:  
1446 32081413; PubMed Central PMCID: PMCPMC7417283.

- 1447 66. Nourski KV, Steinschneider M, Rhone AE, Krause BM, Mueller RN, Kawasaki H, et al. Cortical  
1448 Responses to Vowel Sequences in Awake and Anesthetized States: A Human Intracranial  
1449 Electrophysiology Study. *Cereb Cortex*. 2021;31(12):5435-48. Epub 2021/06/13. doi:  
1450 10.1093/cercor/bhab168. PubMed PMID: 34117741; PubMed Central PMCID:  
1451 PMCPMC8568007.
- 1452 67. Nourski KV, Steinschneider M, Rhone AE, Mueller RN, Kawasaki H, Banks MI. Arousal State-  
1453 Dependence of Interactions Between Short- and Long-Term Auditory Novelty Responses in  
1454 Human Subjects. *Front Hum Neurosci*. 2021;15:737230. Epub 2021/10/19. doi:  
1455 10.3389/fnhum.2021.737230. PubMed PMID: 34658820; PubMed Central PMCID:  
1456 PMCPMC8517406.
- 1457 68. Hipp JF, Hawellek DJ, Corbetta M, Siegel M, Engel AK. Large-scale cortical correlation structure  
1458 of spontaneous oscillatory activity. *Nat Neurosci*. 2012;15(6):884-90. Epub 2012/05/09. doi:  
1459 10.1038/nn.3101. PubMed PMID: 22561454; PubMed Central PMCID: PMCPMC3861400.
- 1460 69. Ercsey-Ravasz M, Markov NT, Lamy C, Van Essen DC, Knoblauch K, Toroczkai Z, et al. A predictive  
1461 network model of cerebral cortical connectivity based on a distance rule. *Neuron*.  
1462 2013;80(1):184-97. Epub 2013/10/08. doi: 10.1016/j.neuron.2013.07.036. PubMed PMID:  
1463 24094111; PubMed Central PMCID: PMCPMC3954498.
- 1464 70. Horvát S, Gămănuț R, Ercsey-Ravasz M, Magrou L, Gămănuț B, Van Essen DC, et al. Spatial  
1465 Embedding and Wiring Cost Constrain the Functional Layout of the Cortical Network of Rodents  
1466 and Primates. *PLoS Biol*. 2016;14(7):e1002512. Epub 2016/07/22. doi:  
1467 10.1371/journal.pbio.1002512. PubMed PMID: 27441598; PubMed Central PMCID:  
1468 PMCPMC4956175.
- 1469 71. Theodoni P, Majka P, Reser DH, Wójcik DK, Rosa MGP, Wang XJ. Structural Attributes and  
1470 Principles of the Neocortical Connectome in the Marmoset Monkey. *Cereb Cortex*.  
1471 2021;32(1):15-28. Epub 2021/07/19. doi: 10.1093/cercor/bhab191. PubMed PMID: 34274966;  
1472 PubMed Central PMCID: PMCPMC8634603.
- 1473 72. Remedios R, Logothetis NK, Kayser C. An auditory region in the primate insular cortex  
1474 responding preferentially to vocal communication sounds. *J Neurosci*. 2009;29(4):1034-45. Epub  
1475 2009/01/30. doi: 10.1523/JNEUROSCI.4089-08.2009. PubMed PMID: 19176812; PubMed Central  
1476 PMCID: PMCPMC6665141.
- 1477 73. Steinschneider M, Nourski KV, Fishman YI. Representation of speech in human auditory cortex:  
1478 is it special? *Hear Res*. 2013;305:57-73. doi: 10.1016/j.heares.2013.05.013. PubMed PMID:  
1479 23792076; PubMed Central PMCID: PMCPMC3818517.
- 1480 74. Craig AD. Interoception: the sense of the physiological condition of the body. *Curr Opin  
1481 Neurobiol*. 2003;13(4):500-5. Epub 2003/09/11. doi: 10.1016/s0959-4388(03)00090-4. PubMed  
1482 PMID: 12965300.
- 1483 75. Kuehn E, Mueller K, Lohmann G, Schuetz-Bosbach S. Interoceptive awareness changes the  
1484 posterior insula functional connectivity profile. *Brain Struct Funct*. 2016;221(3):1555-71. Epub  
1485 2015/01/24. doi: 10.1007/s00429-015-0989-8. PubMed PMID: 25613901.

- 1486 76. Binder JR, Desai RH, Graves WW, Conant LL. Where is the semantic system? A critical review and  
1487 meta-analysis of 120 functional neuroimaging studies. *Cereb Cortex*. 2009;19(12):2767-96. Epub  
1488 2009/03/31. doi: 10.1093/cercor/bhp055. PubMed PMID: 19329570; PubMed Central PMCID:  
1489 PMCPMC2774390.
- 1490 77. Humphreys GF, Hoffman P, Visser M, Binney RJ, Lambon Ralph MA. Establishing task- and  
1491 modality-dependent dissociations between the semantic and default mode networks. *Proc Natl*  
1492 *Acad Sci U S A*. 2015;112(25):7857-62. Epub 2015/06/10. doi: 10.1073/pnas.1422760112.  
1493 PubMed PMID: 26056304; PubMed Central PMCID: PMCPMC4485123.
- 1494 78. Jackson RL, Hoffman P, Pobric G, Lambon Ralph MA. The Semantic Network at Work and Rest:  
1495 Differential Connectivity of Anterior Temporal Lobe Subregions. *J Neurosci*. 2016;36(5):1490-  
1496 501. Epub 2016/02/05. doi: 10.1523/JNEUROSCI.2999-15.2016. PubMed PMID: 26843633;  
1497 PubMed Central PMCID: PMCPMC4737765.
- 1498 79. Bernstein LE, Liebenthal E. Neural pathways for visual speech perception. *Front Neurosci*.  
1499 2014;8:386. Epub 2014/12/19. doi: 10.3389/fnins.2014.00386. PubMed PMID: 25520611;  
1500 PubMed Central PMCID: PMCPMC4248808.
- 1501 80. Hacker CD, Snyder AZ, Pahwa M, Corbetta M, Leuthardt EC. Frequency-specific  
1502 electrophysiologic correlates of resting state fMRI networks. *Neuroimage*. 2017;149:446-57.  
1503 Epub 2017/02/06. doi: 10.1016/j.neuroimage.2017.01.054. PubMed PMID: 28159686; PubMed  
1504 Central PMCID: PMCPMC5745814.
- 1505 81. Kiebel SJ, Daunizeau J, Friston KJ. A hierarchy of time-scales and the brain. *PLoS Comput Biol*.  
1506 2008;4(11):e1000209. Epub 2008/11/15. doi: 10.1371/journal.pcbi.1000209. PubMed PMID:  
1507 19008936; PubMed Central PMCID: PMCPMC2568860.
- 1508 82. Keitel A, Gross J. Individual Human Brain Areas Can Be Identified from Their Characteristic  
1509 Spectral Activation Fingerprints. *PLoS Biol*. 2016;14(6):e1002498. Epub 2016/06/30. doi:  
1510 10.1371/journal.pbio.1002498. PubMed PMID: 27355236; PubMed Central PMCID:  
1511 PMCPMC4927181.
- 1512 83. Fowlkes EB, Mallows CL. A Method for Comparing Two Hierarchical Clusterings. *Journal of the*  
1513 *American Statistical Association*. 1983;78(383):553-69. doi: 10.1080/01621459.1983.10478008.
- 1514 84. Hennig C. Cluster-wise assessment of cluster stability. *Computational Statistics & Data Analysis*.  
1515 2007;52(1):258-71. doi: <https://doi.org/10.1016/j.csda.2006.11.025>.
- 1516 85. Nourski KV, Steinschneider M, Rhone AE, Howard Iii MA. Intracranial Electrophysiology of  
1517 Auditory Selective Attention Associated with Speech Classification Tasks. *Front Hum Neurosci*.  
1518 2016;10:691. Epub 2017/01/26. doi: 10.3389/fnhum.2016.00691. PubMed PMID: 28119593;  
1519 PubMed Central PMCID: PMCPMC5222875.
- 1520 86. Steinschneider M, Nourski KV, Rhone AE, Kawasaki H, Oya H, Howard MA, 3rd. Differential  
1521 activation of human core, non-core and auditory-related cortex during speech categorization  
1522 tasks as revealed by intracranial recordings. *Front Neurosci*. 2014;8:240. doi:  
1523 10.3389/fnins.2014.00240. PubMed PMID: 25157216; PubMed Central PMCID:  
1524 PMCPMC4128221.

- 1525 87. Nourski KV, Steinschneider M, Rhone AE, Kovach CK, Kawasaki H, Howard MA, 3rd. Gamma  
1526 Activation and Alpha Suppression within Human Auditory Cortex during a Speech Classification  
1527 Task. *J Neurosci*. 2022;42(25):5034-46. Epub 2022/05/10. doi: 10.1523/JNEUROSCI.2187-  
1528 21.2022. PubMed PMID: 35534226; PubMed Central PMCID: PMCPMC9233444.
- 1529 88. Schaefer A, Kong R, Gordon EM, Laumann TO, Zuo XN, Holmes AJ, et al. Local-Global Parcellation  
1530 of the Human Cerebral Cortex from Intrinsic Functional Connectivity MRI. *Cereb Cortex*.  
1531 2018;28(9):3095-114. Epub 2017/10/06. doi: 10.1093/cercor/bhx179. PubMed PMID: 28981612;  
1532 PubMed Central PMCID: PMCPMC6095216.
- 1533 89. Bullmore E, Sporns O. Complex brain networks: graph theoretical analysis of structural and  
1534 functional systems. *NatRevNeurosci*. 2009;10(3):186-98. doi: nrn2575 [pii];10.1038/nrn2575  
1535 [doi].
- 1536 90. Chapter 5 - Centrality and Hubs. In: Fornito A, Zalesky A, Bullmore ET, editors. *Fundamentals of*  
1537 *Brain Network Analysis*. San Diego: Academic Press; 2016. p. 137-61.
- 1538 91. Knecht S, Drager B, Deppe M, Bobe L, Lohmann H, Floel A, et al. Handedness and hemispheric  
1539 language dominance in healthy humans. *Brain*. 2000;123 Pt 12:2512-8. Epub 2000/12/02. doi:  
1540 10.1093/brain/123.12.2512. PubMed PMID: 11099452.
- 1541 92. Schirmer A, Fox PM, Grandjean D. On the spatial organization of sound processing in the human  
1542 temporal lobe: a meta-analysis. *Neuroimage*. 2012;63(1):137-47. Epub 2012/06/27. doi:  
1543 10.1016/j.neuroimage.2012.06.025. PubMed PMID: 22732561.
- 1544 93. Ardila A, Bernal B, Rosselli M. How Localized are Language Brain Areas? A Review of Brodmann  
1545 Areas Involvement in Oral Language. *Arch Clin Neuropsychol*. 2016;31(1):112-22. Epub  
1546 2015/12/15. doi: 10.1093/arclin/acv081. PubMed PMID: 26663825.
- 1547 94. Kucyi A, Schrouff J, Bickel S, Foster BL, Shine JM, Parvizi J. Intracranial Electrophysiology Reveals  
1548 Reproducible Intrinsic Functional Connectivity within Human Brain Networks. *J Neurosci*.  
1549 2018;38(17):4230-42. Epub 2018/04/08. doi: 10.1523/jneurosci.0217-18.2018. PubMed PMID:  
1550 29626167; PubMed Central PMCID: PMCPMC5963853.
- 1551 95. Hull JV, Dokovna LB, Jacokes ZJ, Torgerson CM, Irimia A, Van Horn JD. Resting-State Functional  
1552 Connectivity in Autism Spectrum Disorders: A Review. *Front Psychiatry*. 2016;7:205. Epub  
1553 2017/01/20. doi: 10.3389/fpsyt.2016.00205. PubMed PMID: 28101064; PubMed Central PMCID:  
1554 PMCPMC5209637.
- 1555 96. Badhwar A, Tam A, Dansereau C, Orban P, Hoffstaedter F, Bellec P. Resting-state network  
1556 dysfunction in Alzheimer's disease: A systematic review and meta-analysis. *Alzheimers Dement*  
1557 (Amst). 2017;8:73-85. Epub 2017/06/01. doi: 10.1016/j.dadm.2017.03.007. PubMed PMID:  
1558 28560308; PubMed Central PMCID: PMCPMC5436069.
- 1559 97. Sha Z, Wager TD, Mechelli A, He Y. Common Dysfunction of Large-Scale Neurocognitive  
1560 Networks Across Psychiatric Disorders. *Biol Psychiatry*. 2019;85(5):379-88. Epub 2019/01/08.  
1561 doi: 10.1016/j.biopsych.2018.11.011. PubMed PMID: 30612699.



- 1562 98. Sanders RDB, M. I.; Darracq, M.; Moran, R.; Sleigh, J.; Gosseries, O.; Bonhomme, V.; Brichant, J-  
1563 F.; Rosonova, M.; Raz, A.; Tononi, G.; Massimini, M.; Laureys, S.; Boly, M. Propofol-Induced  
1564 Unresponsiveness is Associated with Impaired Feedforward Connectivity in the Cortical  
1565 Hierarchy. *bioRxiv*. 2017;213504. doi: <https://doi.org/10.1101/213504>.
- 1566 99. Huang Z, Tarnal V, Vlisides PE, Janke EL, McKinney AM, Picton P, et al. Asymmetric neural  
1567 dynamics characterize loss and recovery of consciousness. *Neuroimage*. 2021;236:118042. Epub  
1568 2021/04/14. doi: 10.1016/j.neuroimage.2021.118042. PubMed PMID: 33848623; PubMed  
1569 Central PMCID: PMC8310457.
- 1570 100. Van Essen DC, Donahue C, Dierker DL, Glasser MF. Parcellations and Connectivity Patterns in  
1571 Human and Macaque Cerebral Cortex. In: Kennedy H, Van Essen DC, Christen Y, editors. *Micro-,  
1572 Meso- and Macro-Connectomics of the Brain*. Cham (CH): Springer  
1573 Copyright 2016, The Author(s). 2016. p. 89-106.
- 1574 101. Hackett TA, Preuss TM, Kaas JH. Architectonic identification of the core region in auditory cortex  
1575 of macaques, chimpanzees, and humans. *J Comp Neurol*. 2001;441(3):197-222.
- 1576 102. Hackett TA. Anatomic organization of the auditory cortex. *Handb Clin Neurol*. 2015;129:27-53.  
1577 doi: 10.1016/B978-0-444-62630-1.00002-0. PubMed PMID: 25726261.
- 1578 103. Woods DL, Herron TJ, Cate AD, Yund EW, Stecker GC, Rinne T, et al. Functional properties of  
1579 human auditory cortical fields. *Front Syst Neurosci*. 2010;4:155. Epub 2010/12/17. doi:  
1580 10.3389/fnsys.2010.00155. PubMed PMID: 21160558; PubMed Central PMCID:  
1581 PMC3001989.
- 1582 104. Barton B, Venezia JH, Saberi K, Hickok G, Brewer AA. Orthogonal acoustic dimensions define  
1583 auditory field maps in human cortex. *Proc Natl Acad Sci U S A*. 2012;109(50):20738-43. Epub  
1584 2012/11/29. doi: 10.1073/pnas.1213381109. PubMed PMID: 23188798; PubMed Central  
1585 PMCID: PMC3528571.
- 1586 105. Moerel M, De Martino F, Formisano E. An anatomical and functional topography of human  
1587 auditory cortical areas. *Front Neurosci*. 2014;8:225. Epub 2014/08/15. doi:  
1588 10.3389/fnins.2014.00225. PubMed PMID: 25120426; PubMed Central PMCID:  
1589 PMC4114190.
- 1590 106. Howard MA, Volkov IO, Mirsky R, Garell PC, Noh MD, Granner M, et al. Auditory cortex on the  
1591 human posterior superior temporal gyrus. *J Comp Neurol*. 2000;416(1):79-92.
- 1592 107. Nourski KV, Steinschneider M, Oya H, Kawasaki H, Jones RD, Howard MA. Spectral organization  
1593 of the human lateral superior temporal gyrus revealed by intracranial recordings. *Cereb Cortex*.  
1594 2014;24(2):340-52. doi: 10.1093/cercor/bhs314. PubMed PMID: 23048019; PubMed Central  
1595 PMCID: PMC3888366.
- 1596 108. Upadhyay J, Silver A, Knaus TA, Lindgren KA, Ducros M, Kim DS, et al. Effective and structural  
1597 connectivity in the human auditory cortex. *J Neurosci*. 2008;28(13):3341-9. Epub 2008/03/28.  
1598 doi: 10.1523/JNEUROSCI.4434-07.2008. PubMed PMID: 18367601; PubMed Central PMCID:  
1599 PMC6670606.

- 1600 109. Zachlod D, Rüttgers B, Bludau S, Mohlberg H, Langner R, Zilles K, et al. Four new  
1601 cytoarchitectonic areas surrounding the primary and early auditory cortex in human brains.  
1602 Cortex. 2020;128:1-21. Epub 2020/04/17. doi: 10.1016/j.cortex.2020.02.021. PubMed PMID:  
1603 32298845.
- 1604 110. Belin P, Zatorre RJ, Lafaille P, Ahad P, Pike B. Voice-selective areas in human auditory cortex.  
1605 Nature. 2000;403(6767):309-12.
- 1606 111. Deen B, Koldewyn K, Kanwisher N, Saxe R. Functional Organization of Social Perception and  
1607 Cognition in the Superior Temporal Sulcus. Cereb Cortex. 2015;25(11):4596-609. Epub  
1608 2015/06/07. doi: 10.1093/cercor/bhv111. PubMed PMID: 26048954; PubMed Central PMCID:  
1609 PMCPMC4816802.
- 1610 112. Kahn I, Andrews-Hanna JR, Vincent JL, Snyder AZ, Buckner RL. Distinct cortical anatomy linked to  
1611 subregions of the medial temporal lobe revealed by intrinsic functional connectivity. J  
1612 Neurophysiol. 2008;100(1):129-39. Epub 2008/04/04. doi: 10.1152/jn.00077.2008. PubMed  
1613 PMID: 18385483; PubMed Central PMCID: PMCPMC2493488.
- 1614 113. Wang SF, Ritchey M, Libby LA, Ranganath C. Functional connectivity based parcellation of the  
1615 human medial temporal lobe. Neurobiol Learn Mem. 2016;134 Pt A:123-34. Epub 2016/01/26.  
1616 doi: 10.1016/j.nlm.2016.01.005. PubMed PMID: 26805590; PubMed Central PMCID:  
1617 PMCPMC4955645.
- 1618 114. Michelmann S, Price AR, Aubrey B, Strauss CK, Doyle WK, Friedman D, et al. Moment-by-  
1619 moment tracking of naturalistic learning and its underlying hippocampo-cortical interactions.  
1620 Nat Commun. 2021;12(1):5394. Epub 2021/09/15. doi: 10.1038/s41467-021-25376-y. PubMed  
1621 PMID: 34518520; PubMed Central PMCID: PMCPMC8438040.
- 1622 115. Rocchi F, Oya H, Balezeau F, Billig AJ, Kocsis Z, Jenison RL, et al. Common fronto-temporal  
1623 effective connectivity in humans and monkeys. Neuron. 2021;109(5):852-68 e8. Epub  
1624 2021/01/23. doi: 10.1016/j.neuron.2020.12.026. PubMed PMID: 33482086; PubMed Central  
1625 PMCID: PMCPMC7927917.
- 1626 116. Fruhholz S, Trost W, Kotz SA. The sound of emotions-Towards a unifying neural network  
1627 perspective of affective sound processing. Neurosci Biobehav Rev. 2016;68:96-110. Epub  
1628 2016/05/18. doi: 10.1016/j.neubiorev.2016.05.002. PubMed PMID: 27189782.
- 1629 117. Munoz-Lopez M, Insausti R, Mohedano-Moriano A, Mishkin M, Saunders RC. Anatomical  
1630 pathways for auditory memory II: information from rostral superior temporal gyrus to  
1631 dorsolateral temporal pole and medial temporal cortex. Front Neurosci. 2015;9:158. Epub  
1632 2015/06/05. doi: 10.3389/fnins.2015.00158. PubMed PMID: 26041980; PubMed Central PMCID:  
1633 PMCPMC4435056.
- 1634 118. Olson IR, McCoy D, Klobusicky E, Ross LA. Social cognition and the anterior temporal lobes: a  
1635 review and theoretical framework. Soc Cogn Affect Neurosci. 2013;8(2):123-33. Epub  
1636 2012/10/12. doi: 10.1093/scan/nss119. PubMed PMID: 23051902; PubMed Central PMCID:  
1637 PMCPMC3575728.

- 1638 119. Mesulam MM. Paralimbic (mesocortical) areas. Principles of behavioral and cognitive  
1639 neurology. New York, NY: Oxford University Press; 2000. p. 49-54.
- 1640 120. Chanes L, Barrett LF. Redefining the Role of Limbic Areas in Cortical Processing. Trends Cogn Sci.  
1641 2016;20(2):96-106. Epub 2015/12/26. doi: 10.1016/j.tics.2015.11.005. PubMed PMID:  
1642 26704857; PubMed Central PMCID: PMCPMC4780414.
- 1643 121. Maller JJ, Welton T, Middione M, Callaghan FM, Rosenfeld JV, Grieve SM. Revealing the  
1644 Hippocampal Connectome through Super-Resolution 1150-Direction Diffusion MRI. Sci Rep.  
1645 2019;9(1):2418. Epub 2019/02/23. doi: 10.1038/s41598-018-37905-9. PubMed PMID:  
1646 30787303; PubMed Central PMCID: PMCPMC6382767.
- 1647 122. Hickok G. Computational neuroanatomy of speech production. Nat Rev Neurosci.  
1648 2012;13(2):135-45. Epub 2012/01/06. doi: 10.1038/nrn3158. PubMed PMID: 22218206;  
1649 PubMed Central PMCID: PMCPMC5367153.
- 1650 123. Rauschecker JP. An expanded role for the dorsal auditory pathway in sensorimotor control and  
1651 integration. Hear Res. 2011;271(1-2):16-25. Epub 2010/09/21. doi:  
1652 10.1016/j.heares.2010.09.001. PubMed PMID: 20850511; PubMed Central PMCID:  
1653 PMCPMC3021714.
- 1654 124. Smith E, Duede S, Hanrahan S, Davis T, House P, Greger B. Seeing is believing: neural  
1655 representations of visual stimuli in human auditory cortex correlate with illusory auditory  
1656 perceptions. PLoS One. 2013;8(9):e73148. Epub 2013/09/12. doi:  
1657 10.1371/journal.pone.0073148. PubMed PMID: 24023823; PubMed Central PMCID:  
1658 PMCPMC3762867.
- 1659 125. Rolls ET, Rauschecker JP, Deco G, Huang CC, Feng J. Auditory cortical connectivity in humans.  
1660 Cereb Cortex. 2022. Epub 2022/12/28. doi: 10.1093/cercor/bhac496. PubMed PMID: 36573464.
- 1661 126. van den Heuvel MP, Sporns O. Network hubs in the human brain. Trends Cogn Sci.  
1662 2013;17(12):683-96. Epub 2013/11/16. doi: 10.1016/j.tics.2013.09.012. PubMed PMID:  
1663 24231140.
- 1664 127. Simmons WK, Martin A. The anterior temporal lobes and the functional architecture of semantic  
1665 memory. J Int Neuropsychol Soc. 2009;15(5):645-9. Epub 2009/07/28. doi:  
1666 10.1017/S1355617709990348. PubMed PMID: 19631024; PubMed Central PMCID:  
1667 PMCPMC2791360.
- 1668 128. Abel TJ, Rhone AE, Nourski KV, Kawasaki H, Oya H, Griffiths TD, et al. Direct physiologic evidence  
1669 of a heteromodal convergence region for proper naming in human left anterior temporal lobe. J  
1670 Neurosci. 2015;35(4):1513-20. doi: 10.1523/JNEUROSCI.3387-14.2015. PubMed PMID:  
1671 25632128; PubMed Central PMCID: PMCPMC4308598.
- 1672 129. Patterson K, Nestor PJ, Rogers TT. Where do you know what you know? The representation of  
1673 semantic knowledge in the human brain. Nat Rev Neurosci. 2007;8(12):976-87. Epub  
1674 2007/11/21. doi: 10.1038/nrn2277. PubMed PMID: 18026167.

- 1675 130. Scott SK, Blank CC, Rosen S, Wise RJ. Identification of a pathway for intelligible speech in the left  
1676 temporal lobe. *Brain*. 2000;123 Pt 12:2400-6. Epub 2000/12/02. doi:  
1677 10.1093/brain/123.12.2400. PubMed PMID: 11099443; PubMed Central PMCID:  
1678 PMCPMC5630088.
- 1679 131. Spitsyna G, Warren JE, Scott SK, Turkheimer FE, Wise RJ. Converging language streams in the  
1680 human temporal lobe. *J Neurosci*. 2006;26(28):7328-36. Epub 2006/07/14. doi:  
1681 10.1523/JNEUROSCI.0559-06.2006. PubMed PMID: 16837579; PubMed Central PMCID:  
1682 PMCPMC6674192.
- 1683 132. Gorno-Tempini ML, Dronkers NF, Rankin KP, Ogar JM, Phengrasamy L, Rosen HJ, et al. Cognition  
1684 and anatomy in three variants of primary progressive aphasia. *Ann Neurol*. 2004;55(3):335-46.  
1685 Epub 2004/03/03. doi: 10.1002/ana.10825. PubMed PMID: 14991811; PubMed Central PMCID:  
1686 PMCPMC2362399.
- 1687 133. Mesulam MM. From sensation to cognition. *Brain*. 1998;121 ( Pt 6):1013-52.
- 1688 134. Rolls ET. The cingulate cortex and limbic systems for emotion, action, and memory. *Brain Struct*  
1689 *Funct*. 2019;224(9):3001-18. Epub 2019/08/28. doi: 10.1007/s00429-019-01945-2. PubMed  
1690 PMID: 31451898; PubMed Central PMCID: PMCPMC6875144.
- 1691 135. Engel AK, Gerloff C, Hlilgetag CC, Nolte G. Intrinsic coupling modes: multiscale interactions in  
1692 ongoing brain activity. *Neuron*. 2013;80(4):867-86. Epub 2013/11/26. doi:  
1693 10.1016/j.neuron.2013.09.038. PubMed PMID: 24267648.
- 1694 136. Ojemann GA, Ojemann J, Ramsey NF. Relation between functional magnetic resonance imaging  
1695 (fMRI) and single neuron, local field potential (LFP) and electrocorticography (ECoG) activity in  
1696 human cortex. *Front Hum Neurosci*. 2013;7:34. Epub 2013/02/23. doi:  
1697 10.3389/fnhum.2013.00034. PubMed PMID: 23431088; PubMed Central PMCID:  
1698 PMCPMC3576621.
- 1699 137. Makris N, Papadimitriou GM, Kaiser JR, Sorg S, Kennedy DN, Pandya DN. Delineation of the  
1700 middle longitudinal fascicle in humans: a quantitative, in vivo, DT-MRI study. *Cereb Cortex*.  
1701 2009;19(4):777-85. Epub 2008/08/02. doi: 10.1093/cercor/bhn124. PubMed PMID: 18669591;  
1702 PubMed Central PMCID: PMCPMC2651473.
- 1703 138. Binney RJ, Parker GJ, Lambon Ralph MA. Convergent connectivity and graded specialization in  
1704 the rostral human temporal lobe as revealed by diffusion-weighted imaging probabilistic  
1705 tractography. *J Cogn Neurosci*. 2012;24(10):1998-2014. Epub 2012/06/23. doi:  
1706 10.1162/jocn\_a\_00263. PubMed PMID: 22721379.
- 1707 139. Gonzalez Alam T, McKeown BLA, Gao Z, Bernhardt B, Vos de Wael R, Margulies DS, et al. A tale  
1708 of two gradients: differences between the left and right hemispheres predict semantic  
1709 cognition. *Brain Struct Funct*. 2021. Epub 2021/09/13. doi: 10.1007/s00429-021-02374-w.  
1710 PubMed PMID: 34510282.
- 1711 140. Dobbins IG, Wagner AD. Domain-general and domain-sensitive prefrontal mechanisms for  
1712 recollecting events and detecting novelty. *Cereb Cortex*. 2005;15(11):1768-78. Epub  
1713 2005/02/25. doi: 10.1093/cercor/bhi054. PubMed PMID: 15728740.

- 1714 141. Hartwigsen G, Bengio Y, Bzdok D. How does hemispheric specialization contribute to human-  
1715 defining cognition? *Neuron*. 2021;109(13):2075-90. Epub 2021/05/19. doi:  
1716 10.1016/j.neuron.2021.04.024. PubMed PMID: 34004139; PubMed Central PMCID:  
1717 PMCPMC8273110.
- 1718 142. Sherman SM, Guillery RW. Distinct functions for direct and transthalamic corticocortical  
1719 connections. *J Neurophysiol*. 2011;106(3):1068-77. doi: jn.00429.2011  
1720 [pii];10.1152/jn.00429.2011 [doi].
- 1721 143. Hu B. Functional organization of lemniscal and nonlemniscal auditory thalamus. *Exp Br Res*.  
1722 2003;153(4):543-9.
- 1723 144. Seitzman BA, Snyder AZ, Leuthardt EC, Shimony JS. The State of Resting State Networks. *Top*  
1724 *Magn Reson Imaging*. 2019;28(4):189-96. Epub 2019/08/07. doi:  
1725 10.1097/RMR.0000000000000214. PubMed PMID: 31385898; PubMed Central PMCID:  
1726 PMCPMC6686880.
- 1727 145. Feinsinger A, Pouratian N, Ebadi H, Adolphs R, Andersen R, Beauchamp MS, et al. Ethical  
1728 commitments, principles, and practices guiding intracranial neuroscientific research in humans.  
1729 *Neuron*. 2022;110(2):188-94. Epub 2022/01/21. doi: 10.1016/j.neuron.2021.11.011. PubMed  
1730 PMID: 35051364.
- 1731 146. Nourski KV, Howard MA, 3rd. Invasive recordings in the human auditory cortex. *Handb Clin*  
1732 *Neurol*. 2015;129:225-44. doi: 10.1016/B978-0-444-62630-1.00013-5. PubMed PMID: 25726272.
- 1733 147. Jenkinson M, Bannister P, Brady M, Smith S. Improved optimization for the robust and accurate  
1734 linear registration and motion correction of brain images. *Neuroimage*. 2002;17(2):825-41. Epub  
1735 2002/10/16. PubMed PMID: 12377157.
- 1736 148. Rohr K, Stiehl HS, Sprengel R, Buzug TM, Weese J, Kuhn MH. Landmark-based elastic registration  
1737 using approximating thin-plate splines. *IEEE Trans Med Imaging*. 2001;20(6):526-34. Epub  
1738 2001/07/05. doi: 10.1109/42.929618. PubMed PMID: 11437112.
- 1739 149. Dale AM, Fischl B, Sereno MI. Cortical surface-based analysis. I. Segmentation and surface  
1740 reconstruction. *Neuroimage*. 1999;9(2):179-94. Epub 1999/02/05. doi:  
1741 10.1006/nimg.1998.0395. PubMed PMID: 9931268.
- 1742 150. Fischl B, Salat DH, Busa E, Albert M, Dieterich M, Haselgrove C, et al. Whole brain segmentation:  
1743 automated labeling of neuroanatomical structures in the human brain. *Neuron*. 2002;33(3):341-  
1744 55. Epub 2002/02/08. doi: 10.1016/s0896-6273(02)00569-x. PubMed PMID: 11832223.
- 1745 151. Destrieux C, Fischl B, Dale A, Halgren E. Automatic parcellation of human cortical gyri and sulci  
1746 using standard anatomical nomenclature. *Neuroimage*. 2010;53(1):1-15. doi:  
1747 10.1016/j.neuroimage.2010.06.010. PubMed PMID: 20547229; PubMed Central PMCID:  
1748 PMCPMC2937159.
- 1749 152. Destrieux C, Terrier LM, Andersson F, Love SA, Cottier JP, Duvernoy H, et al. A practical guide for  
1750 the identification of major sulcogyral structures of the human cortex. *Brain Struct Funct*.  
1751 2017;222(4):2001-15. doi: 10.1007/s00429-016-1320-z. PubMed PMID: 27709299.

- 1752 153. Jenkinson M, Beckmann CF, Behrens TE, Woolrich MW, Smith SM. FSL. Neuroimage.  
1753 2012;62(2):782-90. Epub 2011/10/08. doi: 10.1016/j.neuroimage.2011.09.015. PubMed PMID:  
1754 21979382.
- 1755 154. Brugge JF, Nourski KV, Oya H, Reale RA, Kawasaki H, Steinschneider M, et al. Coding of repetitive  
1756 transients by auditory cortex on Heschl's gyrus. J Neurophysiol. 2009;102(4):2358-74. doi:  
1757 10.1152/jn.91346.2008. PubMed PMID: 19675285; PubMed Central PMCID: PMCPMC2775384.
- 1758 155. Nourski KV, Steinschneider M, Rhone AE. Electrographic Activation within Human  
1759 Auditory Cortex during Dialog-Based Language and Cognitive Testing. Front Hum Neurosci.  
1760 2016;10:202. doi: 10.3389/fnhum.2016.00202. PubMed PMID: 27199720; PubMed Central  
1761 PMCID: PMCPMC4854871.
- 1762 156. Power JD, Barnes KA, Snyder AZ, Schlaggar BL, Petersen SE. Spurious but systematic correlations  
1763 in functional connectivity MRI networks arise from subject motion. Neuroimage.  
1764 2012;59(3):2142-54. Epub 2011/10/25. doi: 10.1016/j.neuroimage.2011.10.018. PubMed PMID:  
1765 22019881; PubMed Central PMCID: PMCPMC3254728.
- 1766 157. Kovach CK, Gander PE. The demodulated band transform. J Neurosci Methods. 2016;261:135-  
1767 54. doi: 10.1016/j.jneumeth.2015.12.004. PubMed PMID: 26711370; PubMed Central PMCID:  
1768 PMCPMC5084918.
- 1769 158. Satopaa V, Albrecht J, Irwin D, Raghavan B, editors. Finding a "Kneedle" in a Haystack: Detecting  
1770 Knee Points in System Behavior. 2011 31st International Conference on Distributed Computing  
1771 Systems Workshops; 2011 20-24 June 2011.
- 1772 159. Field CA, Welsh AH. Bootstrapping clustered data. Journal of the Royal Statistical Society: Series  
1773 B (Statistical Methodology). 2007;69(3):369-90. doi: [https://doi.org/10.1111/j.1467-](https://doi.org/10.1111/j.1467-9868.2007.00593.x)  
1774 [9868.2007.00593.x](https://doi.org/10.1111/j.1467-9868.2007.00593.x).
- 1775 160. Ren S, Lai H, Tong W, Aminzadeh M, Hou X, Lai S. Nonparametric bootstrapping for hierarchical  
1776 data. Journal of Applied Statistics. 2010;37(9):1487-98. doi: 10.1080/02664760903046102.
- 1777
